# Supplementary material for: A Unique Set of the Burkholderia Collagen-Like Proteins Provides Insight into Pathogenesis, Genome Evolution and Niche Adaptation, and Infection Detection
Source: PubMed Central journal article supplement (PMC4565658; doi:10.1371/journal.pone.0137578), 2015-09-10
Supplement: pone.0137578.s002.pdf [file pone.0137578.s002.pdf]

## Percent Identity

|    | 1   | 2    | 3    | 4    | 5    | 6    | 7    | 8    | 9    | 10   | 11   | 12   | 13   | 14   | 15   | 16   | 17   | 18   | 19    | 20   | 21   | 22   | 23   | 24    | 25    | 26    | 27   | 28    | 29    |    |
|----|-----|------|------|------|------|------|------|------|------|------|------|------|------|------|------|------|------|------|-------|------|------|------|------|-------|-------|-------|------|-------|-------|----|
| 1  | █   | 90.2 | 90.7 | 87.7 | 93.6 | 96.8 | 90.4 | 87.5 | 86.5 | 89.6 | 93.8 | 93.3 | 90.9 | 96.6 | 89.2 | 84.7 | 89.2 | 90.6 | 89.2  | 91.9 | 89.2 | 86.2 | 96.8 | 86.2  | 89.2  | 89.2  | 93.4 | 89.2  | 89.2  | 1  |
| 2  | 2.6 | █    | 98.1 | 91.4 | 94.6 | 89.1 | 97.8 | 80.3 | 78.8 | 81.8 | 86.4 | 94.9 | 83.2 | 88.9 | 95.8 | 90.9 | 96.0 | 99.0 | 95.8  | 96.3 | 95.6 | 92.8 | 91.8 | 92.8  | 95.8  | 95.8  | 94.8 | 95.8  | 95.8  | 2  |
| 3  | 2.0 | 2.0  | █    | 90.9 | 95.3 | 89.7 | 99.7 | 80.3 | 79.1 | 82.2 | 86.7 | 94.3 | 83.5 | 89.6 | 97.0 | 92.8 | 96.8 | 99.2 | 97.0  | 96.5 | 97.1 | 93.9 | 92.1 | 93.9  | 97.0  | 97.0  | 95.5 | 97.0  | 97.0  | 3  |
| 4  | 2.3 | 3.1  | 3.7  | █    | 91.4 | 86.2 | 90.6 | 86.2 | 85.0 | 79.3 | 83.3 | 92.1 | 80.6 | 86.0 | 89.6 | 85.0 | 89.7 | 91.4 | 89.6  | 94.4 | 89.4 | 86.5 | 89.2 | 86.5  | 89.6  | 89.6  | 91.6 | 89.6  | 89.6  | 4  |
| 5  | 2.2 | 2.6  | 1.9  | 3.2  | █    | 92.4 | 94.9 | 83.2 | 82.0 | 85.0 | 89.6 | 98.7 | 86.4 | 92.3 | 93.4 | 89.2 | 93.6 | 95.3 | 93.4  | 97.0 | 93.6 | 90.4 | 94.8 | 90.4  | 93.4  | 93.4  | 99.8 | 93.4  | 93.4  | 5  |
| 6  | 2.0 | 2.2  | 1.4  | 2.3  | 1.8  | █    | 89.4 | 89.4 | 88.2 | 91.2 | 95.6 | 91.8 | 92.6 | 99.5 | 88.2 | 83.7 | 88.2 | 89.7 | 88.2  | 91.1 | 88.2 | 85.2 | 95.3 | 85.2  | 88.2  | 88.2  | 92.6 | 88.2  | 88.2  | 6  |
| 7  | 2.0 | 2.0  | 0.0  | 3.8  | 1.9  | 1.4  | █    | 80.0 | 78.8 | 81.8 | 86.4 | 93.9 | 83.2 | 89.2 | 96.6 | 92.4 | 96.5 | 98.8 | 96.6  | 96.1 | 96.8 | 93.6 | 91.8 | 93.6  | 96.6  | 96.6  | 95.1 | 96.6  | 96.6  | 7  |
| 8  | 2.7 | 2.3  | 2.3  | 2.3  | 2.5  | 2.3  | 2.3  | █    | 96.3 | 90.7 | 92.1 | 83.2 | 91.9 | 89.2 | 78.8 | 74.2 | 78.8 | 80.3 | 78.8  | 81.8 | 78.8 | 75.8 | 86.0 | 75.8  | 78.8  | 78.8  | 83.3 | 78.8  | 78.8  | 8  |
| 9  | 2.1 | 2.3  | 1.8  | 1.8  | 2.1  | 1.8  | 1.8  | 3.0  | █    | 92.4 | 91.1 | 81.8 | 94.9 | 88.0 | 77.6 | 73.1 | 77.6 | 79.1 | 77.6  | 80.6 | 77.6 | 74.6 | 85.0 | 74.6  | 77.6  | 77.6  | 82.2 | 77.6  | 77.6  | 9  |
| 10 | 1.8 | 2.0  | 1.5  | 1.6  | 1.8  | 1.5  | 1.5  | 2.6  | 2.3  | █    | 94.4 | 84.8 | 97.1 | 91.1 | 80.6 | 76.1 | 80.6 | 82.2 | 80.6  | 83.7 | 80.6 | 77.6 | 88.2 | 77.6  | 80.6  | 80.6  | 85.2 | 80.6  | 80.6  | 10 |
| 11 | 2.1 | 1.9  | 1.5  | 2.2  | 1.7  | 1.7  | 1.5  | 2.7  | 2.1  | 1.3  | █    | 88.7 | 95.8 | 95.6 | 85.2 | 80.6 | 85.2 | 86.7 | 85.2  | 88.2 | 85.2 | 82.2 | 92.3 | 82.2  | 85.2  | 85.2  | 89.7 | 85.2  | 85.2  | 11 |
| 12 | 2.6 | 2.3  | 3.0  | 2.4  | 1.5  | 2.6  | 3.0  | 2.5  | 2.3  | 2.0  | 2.7  | █    | 86.2 | 91.6 | 92.4 | 88.2 | 92.6 | 94.3 | 92.4  | 96.0 | 92.6 | 89.4 | 95.1 | 89.4  | 92.4  | 92.4  | 98.8 | 92.4  | 92.4  | 12 |
| 13 | 2.0 | 2.2  | 1.7  | 1.8  | 2.0  | 1.7  | 1.7  | 3.0  | 0.9  | 1.8  | 1.5  | 2.2  | █    | 92.4 | 82.0 | 77.4 | 82.0 | 83.5 | 82.0  | 85.0 | 82.0 | 79.0 | 89.4 | 79.0  | 82.0  | 82.0  | 86.5 | 82.0  | 82.0  | 13 |
| 14 | 2.2 | 2.4  | 1.6  | 2.6  | 2.0  | 0.6  | 1.6  | 2.5  | 2.1  | 1.8  | 1.7  | 2.8  | 2.0  | █    | 88.0 | 83.5 | 88.0 | 89.6 | 88.0  | 90.9 | 88.0 | 85.0 | 95.1 | 85.0  | 88.0  | 88.0  | 92.4 | 88.0  | 88.0  | 14 |
| 15 | 2.0 | 2.9  | 1.6  | 3.5  | 2.3  | 1.4  | 1.6  | 2.3  | 1.8  | 1.5  | 1.5  | 3.4  | 1.7  | 1.6  | █    | 93.8 | 99.8 | 96.8 | 100.0 | 95.1 | 99.8 | 95.6 | 90.6 | 95.6  | 100.0 | 100.0 | 93.6 | 100.0 | 100.0 | 15 |
| 16 | 2.0 | 3.3  | 1.3  | 3.5  | 1.9  | 1.4  | 1.3  | 2.3  | 1.8  | 1.5  | 1.5  | 3.0  | 1.7  | 1.6  | 1.8  | █    | 93.6 | 91.9 | 93.8  | 90.6 | 93.9 | 96.8 | 86.0 | 96.8  | 93.8  | 93.8  | 89.4 | 93.8  | 93.8  | 16 |
| 17 | 2.0 | 2.7  | 1.8  | 3.3  | 2.1  | 1.4  | 1.8  | 2.3  | 1.8  | 1.5  | 1.5  | 3.2  | 1.7  | 1.6  | 0.2  | 2.0  | █    | 97.0 | 99.8  | 95.3 | 99.7 | 95.5 | 90.4 | 95.5  | 99.8  | 99.8  | 93.8 | 99.8  | 99.8  | 17 |
| 18 | 2.2 | 1.1  | 0.9  | 3.1  | 1.9  | 1.4  | 0.9  | 2.3  | 1.8  | 1.5  | 1.5  | 3.0  | 1.7  | 1.6  | 1.8  | 2.2  | 1.6  | █    | 96.8  | 97.0 | 96.6 | 93.8 | 91.8 | 93.8  | 96.8  | 96.8  | 95.5 | 96.8  | 96.8  | 18 |
| 19 | 2.0 | 2.9  | 1.6  | 3.5  | 2.3  | 1.4  | 1.6  | 2.3  | 1.8  | 1.5  | 1.5  | 3.4  | 1.7  | 1.6  | 0.0  | 1.8  | 0.2  | 1.8  | █     | 95.1 | 99.8 | 95.6 | 90.6 | 95.6  | 100.0 | 100.0 | 93.6 | 100.0 | 100.0 | 19 |
| 20 | 2.4 | 2.4  | 2.2  | 1.4  | 1.7  | 1.6  | 2.2  | 2.3  | 1.8  | 1.5  | 1.5  | 2.8  | 1.7  | 1.8  | 2.0  | 2.0  | 1.8  | 1.7  | 2.0   | █    | 94.9 | 92.1 | 93.4 | 92.1  | 95.1  | 95.1  | 97.1 | 95.1  | 95.1  | 20 |
| 21 | 2.0 | 3.1  | 1.4  | 3.8  | 2.1  | 1.4  | 1.5  | 2.3  | 1.8  | 1.5  | 1.5  | 3.2  | 1.7  | 1.6  | 0.2  | 1.6  | 0.4  | 2.0  | 0.2   | 2.2  | █    | 95.5 | 90.6 | 95.5  | 99.8  | 99.8  | 93.8 | 99.8  | 99.8  | 21 |
| 22 | 2.0 | 2.9  | 1.6  | 3.5  | 2.3  | 1.4  | 1.6  | 2.3  | 1.8  | 1.5  | 1.5  | 3.4  | 1.7  | 1.6  | 1.4  | 1.7  | 1.6  | 1.8  | 1.4   | 2.0  | 1.6  | █    | 87.5 | 100.0 | 95.6  | 95.6  | 90.6 | 95.6  | 95.6  | 22 |
| 23 | 2.0 | 2.5  | 2.1  | 2.3  | 2.5  | 2.0  | 2.2  | 2.7  | 2.1  | 1.5  | 2.1  | 2.1  | 2.0  | 2.2  | 2.1  | 2.1  | 2.3  | 2.5  | 2.1   | 2.3  | 2.1  | 2.1  | █    | 87.5  | 90.6  | 90.6  | 94.9 | 90.6  | 90.6  | 23 |
| 24 | 2.0 | 2.9  | 1.6  | 3.5  | 2.3  | 1.4  | 1.6  | 2.3  | 1.8  | 1.5  | 1.5  | 3.4  | 1.7  | 1.6  | 1.4  | 1.7  | 1.6  | 1.8  | 1.4   | 2.0  | 1.6  | 0.0  | 2.1  | █     | 95.6  | 95.6  | 90.6 | 95.6  | 95.6  | 24 |
| 25 | 2.0 | 2.9  | 1.6  | 3.5  | 2.3  | 1.4  | 1.6  | 2.3  | 1.8  | 1.5  | 1.5  | 3.4  | 1.7  | 1.6  | 0.0  | 1.8  | 0.2  | 1.8  | 0.0   | 2.0  | 0.2  | 1.4  | 2.1  | 1.4   | █     | 100.0 | 93.6 | 100.0 | 100.0 | 25 |
| 26 | 2.0 | 2.9  | 1.6  | 3.5  | 2.3  | 1.4  | 1.6  | 2.3  | 1.8  | 1.5  | 1.5  | 3.4  | 1.7  | 1.6  | 0.0  | 1.8  | 0.2  | 1.8  | 0.0   | 2.0  | 0.2  | 1.4  | 2.1  | 1.4   | 0.0   | █     | 93.6 | 100.0 | 100.0 | 26 |
| 27 | 2.4 | 2.5  | 1.7  | 3.0  | 0.2  | 1.6  | 1.7  | 2.3  | 1.8  | 1.5  | 1.5  | 1.3  | 1.7  | 1.8  | 2.1  | 1.7  | 1.9  | 1.7  | 2.1   | 1.5  | 1.9  | 2.1  | 2.3  | 2.1   | 2.1   | 2.1   | █    | 93.6  | 93.6  | 27 |
| 28 | 2.0 | 2.9  | 1.6  | 3.5  | 2.3  | 1.4  | 1.6  | 2.3  | 1.8  | 1.5  | 1.5  | 3.4  | 1.7  | 1.6  | 0.0  | 1.8  | 0.2  | 1.8  | 0.0   | 2.0  | 0.2  | 1.4  | 2.1  | 1.4   | 0.0   | 0.0   | 2.1  | █     | 100.0 | 28 |
| 29 | 2.0 | 2.9  | 1.6  | 3.5  | 2.3  | 1.4  | 1.6  | 2.3  | 1.8  | 1.5  | 1.5  | 3.4  | 1.7  | 1.6  | 0.0  | 1.8  | 0.2  | 1.8  | 0.0   | 2.0  | 0.2  | 1.4  | 2.1  | 1.4   | 0.0   | 0.0   | 2.1  | 0.0   | █     | 29 |
|    | 1   | 2    | 3    | 4    | 5    | 6    | 7    | 8    | 9    | 10   | 11   | 12   | 13   | 14   | 15   | 16   | 17   | 18   | 19    | 20   | 21   | 22   | 23   | 24    | 25    | 26    | 27   | 28    | 29    |    |

Bucl1\_Bps K96243.seq  
 A4LPM8\_BURPS\_Bucl1\_Bps 305.seq  
 A3P738\_BURP0\_Bucl1\_Bps 1106a.seq  
 C4I6P3\_BURPS\_Bucl1\_Bps MSHR346.seq  
 Bucl1\_Bps 1026b.seq  
 Bucl1\_Bps 1710b.seq  
 Bucl1\_Bps BPC006.seq  
 Bucl1\_Bps 668.seq  
 Bucl1\_Bps NCTC 13179.seq  
 Bucl1\_Bps MSHR146.seq  
 Bucl1\_Bps MSHR511.seq  
 Bucl1\_Bps MSHR520.seq  
 Bucl1\_Bps NAU20B-16.seq  
 Bucl1\_Bps NCTC 13178.seq  
 Bucl1\_Bm 2000031281.seq  
 Bucl1\_Bm 2002721280.seq  
 Bucl1\_Bm A188.seq  
 Bucl1\_Bm A193.seq  
 Bucl1\_Bm China 7.seq  
 Bucl1\_Bm PRL-20.seq  
 Bucl1\_Bm strain\_6.seq  
 Bucl1\_Bm strain\_11.seq  
 A2S1L2\_BURM9\_Bucl1\_Bm NCTC 10229.seq  
 A3MCC9\_BURM7\_Bucl1\_Bm NCTC 10247.seq  
 A5J478\_BURMA\_Bucl1\_Bm FMH.seq  
 A5XL93\_BURMA\_Bucl1\_Bm JHU.seq  
 A9K4Y8\_BURMA\_Bucl1\_Bm ATCC 10399.seq  
 C4AZF6\_BURMA\_Bucl1\_Bm GB8 horse 4.seq  
 Q62AX7\_BURMA\_Bucl1\_Bm ATCC 23344.seq

*bucl1*

Percent Identity

|    | 1   | 2    | 3    | 4    | 5    | 6    | 7    | 8    | 9    | 10   | 11    | 12    | 13   | 14   | 15   | 16   | 17   | 18    | 19    | 20   | 21    | 22    | 23    | 24   | 25    | 26    | 27    |      |    |
|----|-----|------|------|------|------|------|------|------|------|------|-------|-------|------|------|------|------|------|-------|-------|------|-------|-------|-------|------|-------|-------|-------|------|----|
| 1  | █   | 88.1 | 91.8 | 96.5 | 93.0 | 90.0 | 90.7 | 79.6 | 95.1 | 96.9 | 88.1  | 96.9  | 85.9 | 95.8 | 94.0 | 96.8 | 84.4 | 84.4  | 84.4  | 83.1 | 83.1  | 84.4  | 84.4  | 88.9 | 84.4  | 84.4  | 83.1  | 1    |    |
| 2  | 4.7 | █    | 95.6 | 87.2 | 93.7 | 93.9 | 81.4 | 86.9 | 91.4 | 89.2 | 100.0 | 89.2  | 95.3 | 85.9 | 84.9 | 87.5 | 91.8 | 91.8  | 91.8  | 91.4 | 91.4  | 91.8  | 91.8  | 95.1 | 91.8  | 91.8  | 91.4  | 2    |    |
| 3  | 1.8 | 3.4  | █    | 91.3 | 97.1 | 96.8 | 84.6 | 86.5 | 94.6 | 93.0 | 95.6  | 93.0  | 92.9 | 89.1 | 88.1 | 90.8 | 91.4 | 91.4  | 91.4  | 90.0 | 90.0  | 91.4  | 91.4  | 95.9 | 91.4  | 91.4  | 90.0  | 3    |    |
| 4  | 2.3 | 4.2  | 1.0  | █    | 91.3 | 88.9 | 91.8 | 78.2 | 93.3 | 94.9 | 87.2  | 94.9  | 84.7 | 96.1 | 94.6 | 97.7 | 83.3 | 83.3  | 83.3  | 82.0 | 82.0  | 83.3  | 83.3  | 87.8 | 83.3  | 83.3  | 82.0  | 4    |    |
| 5  | 1.8 | 4.3  | 1.7  | 2.3  | █    | 94.8 | 85.7 | 85.3 | 94.9 | 94.5 | 93.7  | 94.5  | 91.4 | 89.7 | 89.5 | 92.4 | 90.0 | 90.0  | 90.0  | 88.8 | 88.8  | 90.0  | 90.0  | 94.5 | 90.0  | 90.0  | 88.8  | 5    |    |
| 6  | 3.9 | 5.8  | 3.6  | 3.6  | 4.3  | █    | 83.0 | 86.5 | 92.1 | 90.7 | 93.9  | 90.7  | 92.9 | 86.6 | 85.7 | 88.6 | 91.4 | 91.4  | 91.4  | 90.0 | 90.0  | 91.4  | 91.4  | 95.5 | 91.4  | 91.4  | 90.0  | 6    |    |
| 7  | 4.3 | 6.7  | 4.1  | 4.4  | 4.4  | 5.9  | █    | 74.1 | 87.3 | 89.4 | 81.4  | 89.4  | 79.3 | 92.0 | 94.9 | 92.1 | 78.2 | 78.2  | 78.2  | 77.0 | 77.0  | 78.2  | 78.2  | 81.7 | 78.2  | 78.2  | 77.0  | 7    |    |
| 8  | 0.8 | 1.8  | 0.4  | 1.0  | 0.4  | 0.6  | 1.4  | █    | 82.2 | 80.9 | 86.9  | 80.9  | 89.7 | 77.4 | 76.1 | 78.7 | 92.9 | 92.9  | 92.9  | 93.9 | 93.9  | 92.9  | 92.9  | 88.9 | 92.9  | 92.9  | 93.9  | 8    |    |
| 9  | 2.4 | 4.0  | 1.5  | 2.9  | 2.8  | 4.3  | 5.5  | 1.0  | █    | 96.2 | 91.4  | 96.2  | 89.1 | 92.3 | 91.4 | 93.9 | 87.6 | 87.6  | 87.6  | 85.7 | 85.7  | 87.6  | 87.6  | 92.3 | 87.6  | 87.6  | 85.7  | 9    |    |
| 10 | 1.7 | 5.1  | 1.8  | 2.5  | 1.8  | 4.4  | 4.5  | 1.0  | 2.7  | █    | 89.2  | 100.0 | 87.2 | 93.3 | 92.1 | 95.9 | 85.7 | 85.7  | 85.7  | 84.4 | 84.4  | 85.7  | 85.7  | 90.2 | 85.7  | 85.7  | 84.4  | 10   |    |
| 11 | 4.7 | 0.0  | 3.4  | 4.2  | 4.3  | 5.8  | 6.7  | 1.8  | 4.0  | 5.1  | █     | 89.2  | 95.3 | 85.9 | 84.9 | 87.5 | 91.8 | 91.8  | 91.8  | 91.4 | 91.4  | 91.8  | 91.8  | 95.1 | 91.8  | 91.8  | 91.4  | 11   |    |
| 12 | 1.7 | 5.1  | 1.8  | 2.5  | 1.8  | 4.4  | 4.5  | 1.0  | 2.7  | 0.0  | 5.1   | █     | 87.2 | 93.3 | 92.1 | 95.9 | 85.7 | 85.7  | 85.7  | 84.4 | 84.4  | 85.7  | 85.7  | 90.2 | 85.7  | 85.7  | 84.4  | 12   |    |
| 13 | 4.3 | 2.5  | 3.7  | 4.1  | 4.1  | 3.9  | 6.2  | 1.6  | 3.7  | 4.5  | 2.5   | 4.5   | █    | 84.4 | 82.4 | 85.2 | 95.9 | 95.9  | 95.9  | 94.9 | 94.9  | 95.9  | 95.8  | 95.9 | 95.8  | 95.9  | 95.9  | 94.9 | 13 |
| 14 | 1.6 | 4.3  | 1.8  | 2.6  | 2.8  | 4.6  | 5.8  | 0.4  | 2.7  | 3.0  | 4.3   | 3.0   | 3.0  | █    | 96.5 | 96.1 | 82.8 | 82.8  | 82.8  | 81.5 | 81.5  | 82.8  | 82.8  | 86.0 | 82.8  | 82.8  | 81.5  | 14   |    |
| 15 | 2.0 | 4.0  | 1.5  | 2.8  | 1.5  | 4.1  | 4.0  | 0.4  | 2.3  | 2.9  | 4.0   | 2.9   | 3.9  | 2.3  | █    | 95.5 | 80.9 | 80.9  | 80.9  | 79.6 | 79.6  | 80.9  | 80.9  | 84.9 | 80.9  | 80.9  | 79.6  | 15   |    |
| 16 | 1.9 | 4.0  | 1.3  | 2.3  | 1.1  | 3.7  | 4.2  | 0.4  | 2.4  | 1.6  | 4.0   | 1.6   | 3.7  | 2.8  | 2.0  | █    | 83.6 | 83.6  | 83.6  | 82.2 | 82.2  | 83.6  | 83.6  | 88.2 | 83.6  | 83.6  | 82.2  | 16   |    |
| 17 | 2.9 | 3.7  | 2.4  | 2.7  | 2.7  | 2.5  | 4.4  | 0.8  | 2.4  | 3.1  | 3.7   | 3.1   | 1.8  | 1.8  | 2.5  | 2.5  | █    | 100.0 | 100.0 | 97.2 | 97.2  | 100.0 | 100.0 | 94.8 | 100.0 | 100.0 | 97.2  | 17   |    |
| 18 | 2.9 | 3.7  | 2.4  | 2.7  | 2.7  | 2.5  | 4.4  | 0.8  | 2.4  | 3.1  | 3.7   | 3.1   | 1.8  | 1.8  | 2.5  | 2.5  | 0.0  | █     | 100.0 | 97.2 | 97.2  | 100.0 | 100.0 | 94.8 | 100.0 | 100.0 | 97.2  | 18   |    |
| 19 | 2.9 | 3.7  | 2.4  | 2.7  | 2.7  | 2.5  | 4.4  | 0.8  | 2.4  | 3.1  | 3.7   | 3.1   | 1.8  | 1.8  | 2.5  | 2.5  | 0.0  | 0.0   | █     | 97.2 | 97.2  | 100.0 | 100.0 | 94.8 | 100.0 | 100.0 | 97.2  | 19   |    |
| 20 | 3.0 | 2.6  | 2.6  | 2.8  | 2.6  | 2.8  | 4.3  | 1.2  | 3.2  | 3.2  | 2.6   | 3.2   | 1.5  | 1.8  | 2.6  | 2.6  | 1.8  | 1.8   | 1.8   | █    | 100.0 | 97.2  | 97.2  | 93.0 | 97.2  | 97.2  | 100.0 | 20   |    |
| 21 | 3.0 | 2.6  | 2.6  | 2.8  | 2.6  | 2.8  | 4.3  | 1.2  | 3.2  | 3.2  | 2.6   | 3.2   | 1.5  | 1.8  | 2.6  | 2.6  | 1.8  | 1.8   | 1.8   | 0.0  | █     | 97.2  | 97.2  | 93.0 | 97.2  | 97.2  | 100.0 | 21   |    |
| 22 | 2.9 | 3.7  | 2.4  | 2.7  | 2.7  | 2.5  | 4.4  | 0.8  | 2.4  | 3.1  | 3.7   | 3.1   | 1.8  | 1.8  | 2.5  | 2.5  | 0.0  | 0.0   | 0.0   | 1.8  | 1.8   | █     | 100.0 | 94.8 | 100.0 | 100.0 | 97.2  | 22   |    |
| 23 | 2.9 | 3.7  | 2.4  | 2.7  | 2.7  | 2.5  | 4.4  | 0.8  | 2.4  | 3.1  | 3.7   | 3.1   | 1.8  | 1.8  | 2.5  | 2.5  | 0.0  | 0.0   | 0.0   | 1.8  | 1.8   | 0.0   | █     | 94.8 | 100.0 | 100.0 | 97.2  | 23   |    |
| 24 | 2.1 | 4.4  | 1.6  | 1.9  | 1.9  | 2.3  | 4.8  | 0.8  | 1.4  | 2.2  | 4.4   | 2.2   | 3.5  | 2.6  | 2.4  | 1.5  | 1.6  | 1.6   | 1.6   | 2.2  | 2.2   | 1.6   | 1.6   | █    | 94.8  | 94.8  | 93.0  | 24   |    |
| 25 | 2.9 | 3.7  | 2.4  | 2.7  | 2.7  | 2.5  | 4.4  | 0.8  | 2.4  | 3.1  | 3.7   | 3.1   | 1.8  | 1.8  | 2.5  | 2.5  | 0.0  | 0.0   | 0.0   | 1.8  | 1.8   | 0.0   | 0.0   | 1.6  | █     | 100.0 | 97.2  | 25   |    |
| 26 | 2.9 | 3.7  | 2.4  | 2.7  | 2.7  | 2.5  | 4.4  | 0.8  | 2.4  | 3.1  | 3.7   | 3.1   | 1.8  | 1.8  | 2.5  | 2.5  | 0.0  | 0.0   | 0.0   | 1.8  | 1.8   | 0.0   | 0.0   | 1.6  | 0.0   | █     | 97.2  | 26   |    |
| 27 | 3.0 | 2.6  | 2.6  | 2.8  | 2.6  | 2.8  | 4.3  | 1.2  | 3.2  | 3.2  | 2.6   | 3.2   | 1.5  | 1.8  | 2.6  | 2.6  | 1.8  | 1.8   | 1.8   | 0.0  | 0.0   | 1.8   | 1.8   | 2.2  | 1.8   | 1.8   | █     | 27   |    |

- Bud2\_Bps K96243.seq
- Bud2\_Bps MSHR305.seq
- Bud2\_Bps 1106a.seq
- Bud2\_Bps 1026b.seq
- Bud2\_Bps 1710b.seq
- Bud2\_Bps BPC006.seq
- A3NN74\_BURP6\_Bucl2\_Bp 668.seq
- Bud2\_Bps NCTC 13179.seq
- Bud2\_Bps MSHR146.seq
- Bud2\_Bps MSHR511.seq
- Bud2\_Bps MSHR520.seq
- Bud2\_Bps NAU20B-16.seq
- Bud2\_Bps NCTC 13178.seq
- B7CQL7\_BURPS\_Bucl2\_Bps 576.seq
- C0Y6X0\_BURPS\_Bucl2\_Bps Pakistan 9.seq
- A8EN62\_BURPS\_Bucl2\_Bp 406e.seq
- Bud2\_Bm 2000031281.seq
- Bud2\_Bm 2002721280.seq
- Bud2\_Bm China 7.seq
- Bud2\_Bm strain\_11.seq
- Bud2\_Bm NCTC 10247.seq
- Bud2\_Bm FMH.seq
- Bud2\_Bm JHU.seq
- Bud2\_Bm ATCC 10399.seq
- Bud2\_Bm GB8 horse 4.seq
- Bud2\_Bm ATCC 23344.seq
- Bud2\_Bm SAVP1.seq

*bucl2*

Percent Identity

|    | 1    | 2    | 3    | 4    | 5    | 6    | 7    | 8    | 9    | 10   | 11   | 12   | 13   | 14   | 15   | 16   | 17   | 18   | 19   | 20   | 21   | 22   | 23   | 24   | 25   | 26   | 27   | 28   | 29   | 30   | 31   | 32   | 33   | 34   | 35   | 36   |      |      |      |      |      |      |    |
|----|------|------|------|------|------|------|------|------|------|------|------|------|------|------|------|------|------|------|------|------|------|------|------|------|------|------|------|------|------|------|------|------|------|------|------|------|------|------|------|------|------|------|----|
| 1  | █    | 97.2 | 92.8 | 93.9 | 97.4 | 92.8 | 91.7 | 94.1 | 95.6 | 95.6 | 97.2 | 95.6 | 96.6 | 96.7 | 98.6 | 96.7 | 95.8 | 98.6 | 97.7 | 97.7 | 97.7 | 96.7 | 96.7 | 97.2 | 96.7 | 97.2 | 71.2 | 68.8 | 71.2 | 71.2 | 74.5 | 70.6 | 70.7 | 67.1 | 70.2 | 1    |      |      |      |      |      |      |    |
| 2  | 0.4  | █    | 94.9 | 96.3 | 99.7 | 94.9 | 93.9 | 96.1 | 97.7 | 97.7 | 99.8 | 97.7 | 98.6 | 94.4 | 96.3 | 94.4 | 93.5 | 96.3 | 95.3 | 95.3 | 95.3 | 94.4 | 94.4 | 94.9 | 94.4 | 94.4 | 94.9 | 72.9 | 70.6 | 72.9 | 72.9 | 76.2 | 72.3 | 72.4 | 68.8 | 72.0 | 2    |      |      |      |      |      |    |
| 3  | 0.0  | 0.3  | █    | 91.6 | 95.0 | 99.8 | 95.8 | 98.3 | 97.0 | 97.0 | 94.9 | 97.0 | 94.2 | 94.4 | 91.6 | 94.4 | 95.3 | 91.6 | 93.5 | 93.5 | 93.5 | 94.4 | 94.4 | 93.9 | 94.4 | 94.4 | 93.9 | 70.7 | 67.9 | 70.7 | 70.7 | 72.1 | 69.2 | 68.1 | 69.2 | 70.7 | 3    |      |      |      |      |      |    |
| 4  | 0.4  | 0.4  | 0.4  | █    | 96.4 | 91.6 | 90.7 | 92.8 | 94.4 | 94.4 | 96.3 | 94.4 | 97.2 | 91.1 | 93.9 | 91.1 | 90.2 | 93.9 | 92.1 | 92.1 | 92.1 | 91.1 | 91.1 | 91.6 | 91.1 | 91.1 | 91.6 | 72.9 | 70.6 | 72.9 | 72.9 | 76.2 | 72.3 | 75.7 | 68.8 | 72.0 | 4    |      |      |      |      |      |    |
| 5  | 0.2  | 0.2  | 0.2  | 0.2  | █    | 95.0 | 94.1 | 96.3 | 97.8 | 97.8 | 99.7 | 97.8 | 98.8 | 94.5 | 96.4 | 94.5 | 93.6 | 96.4 | 95.5 | 95.5 | 95.5 | 94.5 | 94.5 | 95.0 | 94.5 | 94.5 | 95.0 | 73.1 | 70.7 | 73.1 | 73.1 | 76.3 | 72.4 | 72.6 | 69.0 | 72.1 | 5    |      |      |      |      |      |    |
| 6  | 0.0  | 0.3  | 0.0  | 0.4  | 0.2  | █    | 95.8 | 98.3 | 97.0 | 97.0 | 94.9 | 97.0 | 94.2 | 94.4 | 91.6 | 94.4 | 95.3 | 91.6 | 93.5 | 93.5 | 93.5 | 94.4 | 94.4 | 93.9 | 94.4 | 94.4 | 93.9 | 70.7 | 67.9 | 70.7 | 70.7 | 72.1 | 69.2 | 68.1 | 69.2 | 70.7 | 6    |      |      |      |      |      |    |
| 7  | 0.2  | 0.3  | 0.3  | 0.4  | 0.2  | 0.3  | █    | 97.0 | 95.8 | 95.8 | 93.9 | 95.8 | 93.0 | 93.6 | 90.8 | 93.6 | 94.5 | 90.8 | 92.7 | 92.7 | 92.7 | 93.6 | 93.6 | 93.1 | 93.6 | 93.6 | 93.1 | 69.8 | 67.0 | 69.8 | 69.8 | 71.2 | 72.7 | 67.1 | 71.3 | 69.8 | 7    |      |      |      |      |      |    |
| 8  | 0.2  | 0.5  | 0.2  | 0.5  | 0.3  | 0.2  | 0.5  | █    | 98.3 | 98.3 | 96.1 | 98.3 | 95.5 | 95.6 | 92.8 | 95.6 | 96.6 | 92.8 | 94.7 | 94.7 | 94.7 | 95.6 | 95.6 | 95.2 | 95.6 | 95.6 | 95.2 | 72.0 | 69.2 | 72.0 | 72.0 | 73.4 | 70.4 | 69.3 | 69.0 | 72.0 | 8    |      |      |      |      |      |    |
| 9  | 0.0  | 0.3  | 0.0  | 0.4  | 0.2  | 0.0  | 0.3  | 0.2  | █    | 99.8 | 97.7 | 99.8 | 97.0 | 96.3 | 94.4 | 96.3 | 95.3 | 94.4 | 96.3 | 96.3 | 96.3 | 96.3 | 96.3 | 96.7 | 96.3 | 96.3 | 96.7 | 73.2 | 70.7 | 73.2 | 73.2 | 74.9 | 72.0 | 70.9 | 69.2 | 72.3 | 9    |      |      |      |      |      |    |
| 10 | 0.0  | 0.3  | 0.0  | 0.4  | 0.2  | 0.0  | 0.3  | 0.2  | 0.0  | █    | 97.7 | 99.8 | 97.0 | 96.3 | 94.4 | 96.3 | 95.3 | 94.4 | 96.3 | 96.3 | 96.3 | 96.3 | 96.3 | 96.3 | 96.3 | 96.7 | 73.2 | 70.7 | 73.2 | 73.2 | 74.9 | 72.0 | 70.9 | 69.2 | 72.3 | 10   |      |      |      |      |      |      |    |
| 11 | 0.4  | 0.0  | 0.3  | 0.4  | 0.2  | 0.3  | 0.3  | 0.5  | 0.3  | 0.3  | █    | 97.7 | 98.6 | 94.4 | 96.3 | 94.4 | 93.5 | 96.3 | 95.3 | 95.3 | 95.3 | 94.4 | 94.4 | 94.9 | 94.4 | 94.4 | 94.9 | 72.9 | 70.6 | 72.9 | 72.9 | 76.2 | 72.3 | 72.4 | 68.8 | 72.0 | 11   |      |      |      |      |      |    |
| 12 | 0.0  | 0.3  | 0.0  | 0.4  | 0.2  | 0.0  | 0.3  | 0.2  | 0.0  | 0.0  | 0.3  | █    | 97.0 | 96.3 | 94.4 | 96.3 | 95.3 | 94.4 | 96.3 | 96.3 | 96.3 | 96.3 | 96.3 | 96.3 | 96.7 | 96.3 | 96.3 | 73.2 | 70.7 | 73.2 | 73.2 | 74.9 | 72.0 | 70.9 | 69.2 | 72.3 | 12   |      |      |      |      |      |    |
| 13 | 0.0  | 0.3  | 0.0  | 0.4  | 0.2  | 0.0  | 0.3  | 0.2  | 0.0  | 0.0  | 0.3  | 0.0  | █    | 93.5 | 96.3 | 93.5 | 92.5 | 96.3 | 94.4 | 94.4 | 94.4 | 93.5 | 93.5 | 93.9 | 93.5 | 93.5 | 93.9 | 73.2 | 70.9 | 73.2 | 73.2 | 76.5 | 72.6 | 73.7 | 69.2 | 72.3 | 13   |      |      |      |      |      |    |
| 14 | 0.4  | 0.4  | 0.3  | 0.4  | 0.2  | 0.3  | 0.2  | 0.5  | 0.3  | 0.3  | 0.4  | 0.3  | 0.4  | █    | 97.0 | 99.8 | 98.9 | 97.0 | 98.9 | 98.9 | 98.9 | 98.9 | 98.9 | 98.9 | 98.9 | 98.9 | 99.4 | 70.2 | 67.4 | 70.2 | 70.2 | 71.7 | 68.7 | 67.6 | 66.4 | 69.5 | 14   |      |      |      |      |      |    |
| 15 | 0.4  | 0.4  | 0.4  | 0.4  | 0.2  | 0.4  | 0.2  | 0.5  | 0.4  | 0.4  | 0.4  | 0.4  | 0.4  | 0.0  | █    | 97.0 | 96.1 | 99.8 | 98.0 | 98.0 | 98.0 | 97.0 | 97.0 | 97.5 | 97.0 | 97.0 | 97.5 | 70.4 | 68.1 | 70.4 | 70.4 | 73.7 | 69.8 | 70.4 | 66.4 | 69.5 | 15   |      |      |      |      |      |    |
| 16 | 0.4  | 0.4  | 0.3  | 0.4  | 0.2  | 0.3  | 0.2  | 0.5  | 0.3  | 0.3  | 0.4  | 0.3  | 0.4  | 0.0  | 0.0  | █    | 98.9 | 97.0 | 98.9 | 98.9 | 98.9 | 98.9 | 98.9 | 98.9 | 98.9 | 98.9 | 99.4 | 70.2 | 67.4 | 70.2 | 70.2 | 71.7 | 68.7 | 67.6 | 66.4 | 69.5 | 16   |      |      |      |      |      |    |
| 17 | 0.4  | 0.4  | 0.3  | 0.4  | 0.2  | 0.3  | 0.2  | 0.5  | 0.3  | 0.3  | 0.4  | 0.3  | 0.4  | 0.0  | 0.0  | 0.0  | █    | 96.1 | 98.0 | 98.0 | 98.0 | 98.9 | 98.9 | 98.9 | 98.9 | 98.9 | 98.4 | 69.3 | 66.5 | 69.3 | 69.3 | 70.7 | 67.8 | 66.7 | 66.4 | 69.3 | 17   |      |      |      |      |      |    |
| 18 | 0.4  | 0.4  | 0.4  | 0.4  | 0.2  | 0.4  | 0.2  | 0.5  | 0.4  | 0.4  | 0.4  | 0.4  | 0.4  | 0.0  | 0.0  | 0.0  | 0.0  | █    | 98.0 | 98.0 | 98.0 | 97.0 | 97.0 | 97.5 | 97.0 | 97.0 | 97.5 | 70.4 | 68.1 | 70.4 | 70.4 | 73.7 | 69.8 | 70.4 | 66.4 | 69.5 | 18   |      |      |      |      |      |    |
| 19 | 0.4  | 0.4  | 0.3  | 0.4  | 0.2  | 0.3  | 0.2  | 0.5  | 0.3  | 0.3  | 0.4  | 0.3  | 0.4  | 0.0  | 0.0  | 0.0  | 0.0  | 0.0  | █    | 99.8 | 99.8 | 98.9 | 98.9 | 98.9 | 98.9 | 98.9 | 99.4 | 70.4 | 68.1 | 70.4 | 70.4 | 72.6 | 69.6 | 68.5 | 66.4 | 69.5 | 19   |      |      |      |      |      |    |
| 20 | 0.4  | 0.4  | 0.3  | 0.4  | 0.2  | 0.3  | 0.2  | 0.5  | 0.3  | 0.3  | 0.4  | 0.3  | 0.4  | 0.0  | 0.0  | 0.0  | 0.0  | 0.0  | 0.0  | 0.0  | █    | 99.8 | 98.9 | 98.9 | 98.9 | 98.9 | 98.9 | 99.4 | 70.4 | 68.1 | 70.4 | 70.4 | 72.6 | 69.6 | 68.5 | 66.4 | 69.5 | 20   |      |      |      |      |    |
| 21 | 0.4  | 0.4  | 0.3  | 0.4  | 0.2  | 0.3  | 0.2  | 0.5  | 0.3  | 0.3  | 0.4  | 0.3  | 0.4  | 0.0  | 0.0  | 0.0  | 0.0  | 0.0  | 0.0  | 0.0  | 0.0  | 0.0  | 0.0  | 0.0  | 0.0  | 0.0  | 98.9 | 98.9 | 98.9 | 98.9 | 98.9 | 99.4 | 70.4 | 68.1 | 70.4 | 72.6 | 69.6 | 68.5 | 66.4 | 69.5 | 21   |      |    |
| 22 | 0.4  | 0.4  | 0.3  | 0.4  | 0.2  | 0.3  | 0.2  | 0.5  | 0.3  | 0.3  | 0.4  | 0.3  | 0.4  | 0.0  | 0.0  | 0.0  | 0.0  | 0.0  | 0.0  | 0.0  | 0.0  | 0.0  | 0.0  | 0.0  | 0.0  | 0.0  | 99.8 | 99.4 | 99.8 | 99.8 | 99.4 | 70.2 | 67.4 | 70.2 | 70.2 | 71.7 | 68.7 | 67.6 | 66.4 | 69.5 | 22   |      |    |
| 23 | 0.4  | 0.4  | 0.3  | 0.4  | 0.2  | 0.3  | 0.2  | 0.5  | 0.3  | 0.3  | 0.4  | 0.3  | 0.4  | 0.0  | 0.0  | 0.0  | 0.0  | 0.0  | 0.0  | 0.0  | 0.0  | 0.0  | 0.0  | 0.0  | 0.0  | 0.0  | 99.4 | 99.8 | 99.8 | 99.4 | 70.2 | 67.4 | 70.2 | 70.2 | 71.7 | 68.7 | 67.6 | 66.4 | 69.5 | 23   |      |      |    |
| 24 | 0.4  | 0.4  | 0.3  | 0.4  | 0.2  | 0.3  | 0.2  | 0.5  | 0.3  | 0.3  | 0.4  | 0.3  | 0.4  | 0.0  | 0.0  | 0.0  | 0.0  | 0.0  | 0.0  | 0.0  | 0.0  | 0.0  | 0.0  | 0.0  | 0.0  | 0.0  | 99.4 | 99.4 | 99.8 | 99.8 | 70.4 | 67.9 | 70.4 | 70.4 | 72.1 | 69.2 | 68.1 | 66.4 | 69.5 | 24   |      |      |    |
| 25 | 0.4  | 0.4  | 0.3  | 0.4  | 0.2  | 0.3  | 0.2  | 0.5  | 0.3  | 0.3  | 0.4  | 0.3  | 0.4  | 0.0  | 0.0  | 0.0  | 0.0  | 0.0  | 0.0  | 0.0  | 0.0  | 0.0  | 0.0  | 0.0  | 0.0  | 0.0  | 99.8 | 99.4 | 70.2 | 67.4 | 70.2 | 70.2 | 71.7 | 68.7 | 67.6 | 66.4 | 69.5 | 25   |      |      |      |      |    |
| 26 | 0.4  | 0.4  | 0.3  | 0.4  | 0.2  | 0.3  | 0.2  | 0.5  | 0.3  | 0.3  | 0.4  | 0.3  | 0.4  | 0.0  | 0.0  | 0.0  | 0.0  | 0.0  | 0.0  | 0.0  | 0.0  | 0.0  | 0.0  | 0.0  | 0.0  | 0.0  | 99.4 | 70.2 | 67.4 | 70.2 | 70.2 | 71.7 | 68.7 | 67.6 | 66.4 | 69.5 | 26   |      |      |      |      |      |    |
| 27 | 0.4  | 0.4  | 0.3  | 0.4  | 0.2  | 0.3  | 0.2  | 0.5  | 0.3  | 0.3  | 0.4  | 0.3  | 0.4  | 0.0  | 0.0  | 0.0  | 0.0  | 0.0  | 0.0  | 0.0  | 0.0  | 0.0  | 0.0  | 0.0  | 0.0  | 0.0  | █    | 70.4 | 67.9 | 70.4 | 70.4 | 72.1 | 69.2 | 68.1 | 66.4 | 69.5 | 27   |      |      |      |      |      |    |
| 28 | 33.6 | 33.6 | 35.8 | 29.5 | 33.4 | 35.8 | 35.8 | 36.0 | 35.4 | 35.4 | 33.6 | 35.4 | 31.9 | 37.2 | 33.8 | 37.2 | 37.2 | 33.8 | 36.2 | 36.2 | 37.2 | 37.2 | 36.8 | 37.2 | 37.2 | 36.8 | 37.2 | 37.2 | 36.8 | 37.2 | 37.2 | 36.8 | 0.0  | 8.7  | 91.6 | 99.8 | 99.8 | 96.6 | 95.8 | 84.3 | 91.7 | 98.9 | 28 |
| 29 | 38.4 | 38.2 | 39.8 | 34.1 | 38.0 | 39.8 | 39.8 | 40.1 | 39.8 | 39.8 | 38.2 | 39.8 | 36.5 | 41.4 | 38.6 | 41.4 | 41.4 | 38.6 | 41.0 | 41.0 | 41.4 | 41.4 | 41.4 | 41.4 | 41.4 | 41.4 | 8.7  | █    | 91.6 | 91.6 | 89.6 | 88.8 | 91.7 | 83.8 | 90.7 | 91.7 | 98.9 | 29   |      |      |      |      |    |
| 30 | 33.6 | 33.6 | 35.8 | 29.5 | 33.4 | 35.8 | 35.8 | 36.0 | 35.4 | 35.4 | 33.6 | 35.4 | 31.9 | 37.2 | 33.8 | 37.2 | 37.2 | 33.8 | 36.2 | 36.2 | 37.2 | 37.2 | 36.8 | 37.2 | 37.2 | 36.8 | 0.0  | 8.7  | █    | 99.8 | 96.6 | 95.8 | 84.3 | 91.7 | 98.9 | 30   |      |      |      |      |      |      |    |
| 31 | 33.6 | 33.6 | 35.8 | 29.5 | 33.4 | 35.8 | 35.8 | 36.0 | 35.4 | 35.4 | 33.6 | 35.4 | 31.9 | 37.2 | 33.8 | 37.2 | 37.2 | 33.8 | 36.2 | 36.2 | 37.2 | 37.2 | 36.8 | 37.2 | 37.2 | 36.8 | 0.0  | 8.7  | 0.0  | █    | 96.6 | 95.8 | 84.3 | 91.7 | 98.9 | 31   |      |      |      |      |      |      |    |
| 32 | 31.2 | 31.3 | 31.1 | 27.2 | 31.0 | 31.1 | 31.1 | 31.4 | 31.1 | 31.1 | 31.3 | 31.1 | 29.6 | 32.4 | 31.4 | 32.4 | 32.4 | 31.4 | 32.4 | 32.4 | 32.4 | 32.4 | 32.4 | 32.4 | 32.4 | 32.4 | 1.5  | 10.2 | 1.5  | 1.5  | █    | 96.0 | 85.0 | 91.3 | 95.6 | 32   |      |      |      |      |      |      |    |
| 33 | 32.3 | 32.3 | 33.3 | 28.2 | 32.1 | 33.3 | 32.6 | 33.6 | 33.3 | 33.3 | 32.3 | 33.3 | 30.6 | 34.6 | 32.4 | 34.6 | 34.6 | 32.4 | 34.6 | 34.6 | 34.6 | 34.6 | 34.6 | 34.6 | 34.6 | 34.6 | 0.8  | 9.3  | 0.8  | 0.8  | 0.7  | █    | 82.4 | 93.9 | 94.9 | 33   |      |      |      |      |      |      |    |
| 34 | 30.5 | 30.6 | 30.0 | 30.6 | 30.3 | 30.0 | 30.0 | 30.3 | 30.0 | 30.0 | 30.6 | 30.0 | 30.0 | 31.3 | 31.3 | 31.3 | 31.3 | 31.3 | 31.3 | 31.3 | 31.3 | 31.3 | 31.3 | 31.3 | 31.3 | 31.3 | 9.3  | 0.7  | 9.3  | 9.3  | 10.8 | 9.9  | █    | 76.5 | 83.3 | 34   |      |      |      |      |      |      |    |
| 35 | 30.2 | 30.3 | 35.4 | 26.2 | 30.0 | 35.4 | 32.9 | 34.0 | 32.0 | 32.0 | 30.3 | 32.0 | 28.6 | 33.8 | 30.3 | 33.8 | 35.0 | 30.3 | 32.7 | 32.7 | 32.7 | 33.8 | 33.8 | 33.3 | 33.8 | 33.3 | 2.2  | 10.8 | 2.2  | 2.2  | 0.7  | 1.3  | 11.6 | █    | 92.7 | 35   |      |      |      |      |      |      |    |
| 36 | 33.6 | 33.6 | 36.9 | 29.5 | 33.4 | 36.9 | 36.9 | 37.2 | 35.4 | 35.4 | 33.6 | 35.4 | 31.9 | 37.4 | 33.8 | 37.4 | 38.4 | 33.8 | 36.2 | 36.2 | 37.4 | 37.4 | 36.8 | 37.4 | 37.4 | 36.8 | 0.0  | 8.7  | 0.0  | 0.0  | 1.5  | 0.8  | 9.3  | 2.2  | █    | 36   |      |      |      |      |      |      |    |
| 1  | 2    | 3    | 4    | 5    | 6    |      |      |      |      |      |      |      |      |      |      |      |      |      |      |      |      |      |      |      |      |      |      |      |      |      |      |      |      |      |      |      |      |      |      |      |      |      |    |

Percent Identity

|    | 1    | 2    | 3    | 4    | 5    | 6     | 7    | 8    | 9    | 10   | 11    | 12   | 13   | 14   | 15   | 16   | 17   | 18   | 19   | 20    | 21   | 22   | 23   | 24   | 25    | 26    | 27   | 28    | 29    | 30   | 31   | 32   | 33   | 34   |                                 |                                |                                |
|----|------|------|------|------|------|-------|------|------|------|------|-------|------|------|------|------|------|------|------|------|-------|------|------|------|------|-------|-------|------|-------|-------|------|------|------|------|------|---------------------------------|--------------------------------|--------------------------------|
| 1  |      | 90.5 | 93.5 | 92.0 | 96.1 | 93.5  | 93.9 | 95.5 | 95.5 | 90.0 | 90.5  | 83.4 | 98.6 | 95.5 | 92.0 | 96.7 | 97.3 | 98.4 | 96.8 | 96.7  | 99.1 | 99.1 | 94.8 | 93.1 | 96.7  | 96.7  | 98.3 | 96.7  | 96.7  | 79.8 | 79.1 | 81.0 | 80.5 | 80.1 | 1                               | Q63JT5_BURPS_Bps_K96243.seq    |                                |
| 2  | 1.1  |      | 96.0 | 97.6 | 93.6 | 96.0  | 95.8 | 93.7 | 87.3 | 80.8 | 100.0 | 80.1 | 89.4 | 86.4 | 83.3 | 93.0 | 92.2 | 89.7 | 88.1 | 93.0  | 90.5 | 90.5 | 94.8 | 85.0 | 93.0  | 93.0  | 91.3 | 93.0  | 93.0  | 77.6 | 88.0 | 80.4 | 82.0 | 84.8 | 2                               | Bucl4_Bps MSHR 305.seq         |                                |
| 3  | 1.1  | 1.1  |      | 97.9 | 96.4 | 100.0 | 99.6 | 96.7 | 90.4 | 83.8 | 96.0  | 81.6 | 92.7 | 89.8 | 86.9 | 96.4 | 95.5 | 92.6 | 90.9 | 96.4  | 93.3 | 93.5 | 97.5 | 87.8 | 96.4  | 96.4  | 94.5 | 96.4  | 96.4  | 78.2 | 84.5 | 80.9 | 82.5 | 85.3 | 3                               | Bucl4_Bps 1106a.seq            |                                |
| 4  | 1.1  | 1.0  | 0.6  |      | 95.0 | 97.9  | 97.6 | 95.6 | 89.2 | 82.5 | 97.6  | 81.2 | 91.3 | 88.5 | 85.4 | 94.8 | 93.9 | 91.1 | 89.5 | 94.8  | 91.9 | 91.9 | 96.2 | 86.4 | 94.8  | 94.8  | 92.8 | 94.8  | 94.8  | 77.9 | 86.2 | 80.7 | 82.2 | 85.0 | 4                               | Bucl4_Bps 1026b.seq            |                                |
| 5  | 0.9  | 1.1  | 1.5  | 1.3  |      | 96.4  | 96.8 | 98.3 | 91.7 | 86.5 | 93.6  | 82.6 | 94.8 | 91.8 | 88.2 | 98.0 | 97.1 | 95.5 | 94.1 | 98.0  | 96.5 | 96.1 | 97.6 | 90.8 | 98.0  | 98.0  | 96.7 | 98.0  | 98.0  | 78.2 | 82.3 | 80.9 | 82.5 | 83.0 | 5                               | Bucl4_Bps 1710b.seq            |                                |
| 6  | 1.1  | 1.1  | 0.0  | 0.6  | 1.5  |       | 99.6 | 96.7 | 90.4 | 83.8 | 96.0  | 81.6 | 92.7 | 89.8 | 86.9 | 96.4 | 95.5 | 92.6 | 90.9 | 96.4  | 93.3 | 93.5 | 97.5 | 87.8 | 96.4  | 96.4  | 94.5 | 96.4  | 96.4  | 78.2 | 84.5 | 80.9 | 82.5 | 85.3 | 6                               | Bucl4_Bps BPC006.seq           |                                |
| 7  | 0.7  | 1.3  | 0.5  | 1.1  | 1.0  | 0.5   |      | 96.4 | 90.0 | 84.2 | 95.8  | 82.0 | 93.1 | 90.1 | 86.5 | 96.1 | 95.2 | 92.9 | 91.3 | 96.1  | 93.6 | 93.9 | 97.2 | 88.1 | 96.1  | 96.1  | 94.8 | 96.1  | 96.1  | 77.8 | 84.6 | 80.6 | 82.2 | 85.0 | 7                               | Bucl4_Bps 668.seq              |                                |
| 8  | 1.5  | 1.0  | 1.1  | 0.5  | 1.9  | 1.1   | 1.5  |      | 92.8 | 85.7 | 93.7  | 82.2 | 94.6 | 91.8 | 88.6 | 98.2 | 97.4 | 94.5 | 92.7 | 98.2  | 95.2 | 95.5 | 98.4 | 89.2 | 98.2  | 98.2  | 96.4 | 98.2  | 98.2  | 79.4 | 82.5 | 81.9 | 83.5 | 84.1 | 8                               | Bucl4_Bps NCTC 13179.seq       |                                |
| 9  | 1.6  | 1.1  | 1.1  | 0.6  | 2.3  | 1.1   | 1.6  | 1.0  |      | 92.5 | 87.3  | 83.6 | 96.2 | 98.1 | 95.5 | 93.2 | 93.7 | 95.6 | 97.0 | 93.2  | 94.8 | 94.9 | 91.9 | 94.8 | 93.2  | 93.2  | 94.4 | 93.2  | 93.2  | 81.3 | 76.0 | 78.7 | 78.1 | 77.8 | 9                               | Bucl4_Bps MSHR146.seq          |                                |
| 10 | 0.6  | 1.4  | 1.5  | 1.2  | 1.0  | 1.5   | 1.0  | 2.0  | 1.3  |      | 80.8  | 83.9 | 90.5 | 93.8 | 96.9 | 86.7 | 87.3 | 90.5 | 91.8 | 86.7  | 89.6 | 89.4 | 84.9 | 94.1 | 86.7  | 86.7  | 88.5 | 86.7  | 86.7  | 80.0 | 69.4 | 71.3 | 70.8 | 70.4 | 10                              | Bucl4_Bps MSHR511.seq          |                                |
| 11 | 1.1  | 0.0  | 1.1  | 1.0  | 1.1  | 1.1   | 1.3  | 1.0  | 1.1  | 1.4  |       | 80.1 | 89.4 | 86.4 | 83.3 | 93.0 | 92.2 | 89.7 | 88.1 | 93.0  | 90.5 | 90.5 | 94.8 | 85.0 | 93.0  | 91.3  | 93.0 | 93.0  | 77.6  | 88.0 | 80.4 | 82.0 | 84.8 | 11   | Bucl4_Bps MSHR520.seq           |                                |                                |
| 12 | 10.0 | 3.7  | 5.7  | 4.3  | 7.3  | 5.7   | 5.2  | 7.8  | 13.3 | 16.7 | 3.7   |      | 83.9 | 84.3 | 84.8 | 82.7 | 82.9 | 83.6 | 84.1 | 82.7  | 83.4 | 83.6 | 81.8 | 84.8 | 82.7  | 82.7  | 83.4 | 82.7  | 82.7  | 82.1 | 70.6 | 73.9 | 73.2 | 72.6 | 12                              | Bucl4_Bps NAU20B-16.seq        |                                |
| 13 | 0.7  | 1.4  | 1.1  | 1.1  | 1.4  | 1.1   | 0.7  | 1.7  | 1.7  | 1.0  | 1.4   | 10.2 |      | 96.1 | 92.7 | 95.7 | 96.4 | 98.8 | 97.2 | 95.7  | 98.1 | 98.1 | 94.0 | 93.2 | 95.7  | 95.7  | 97.4 | 95.7  | 95.7  | 80.2 | 78.1 | 80.1 | 79.7 | 79.4 | 13                              | Bucl4_Bps NCTC 13178.seq       |                                |
| 14 | 0.6  | 1.3  | 0.9  | 0.6  | 1.3  | 0.9   | 0.5  | 1.3  | 1.2  | 0.7  | 1.3   | 13.3 | 0.9  |      | 96.2 | 92.6 | 93.1 | 95.7 | 97.0 | 92.6  | 94.8 | 95.0 | 90.6 | 96.4 | 92.6  | 92.6  | 94.5 | 92.6  | 92.6  | 80.5 | 75.0 | 77.3 | 76.7 | 76.4 | 14                              | B1H7D0_BURPS_Bps S13.seq       |                                |
| 15 | 1.1  | 1.2  | 0.6  | 0.5  | 1.8  | 0.6   | 1.0  | 1.3  | 0.6  | 0.8  | 1.2   | 16.1 | 1.2  | 0.7  |      | 89.7 | 90.2 | 92.1 | 93.4 | 89.7  | 91.3 | 91.4 | 87.7 | 95.8 | 89.7  | 89.7  | 90.9 | 89.7  | 80.8  | 71.7 | 74.4 | 73.8 | 73.5 | 15   | B2HC63_BURPS_Bps 1655.seq       |                                |                                |
| 16 | 1.1  | 0.9  | 0.5  | 0.6  | 1.4  | 0.5   | 0.9  | 1.2  | 1.5  | 1.7  | 0.9   | 8.1  | 1.3  | 1.3  | 1.0  |      | 99.0 | 96.0 | 94.2 | 100.0 | 96.7 | 96.8 | 97.8 | 90.6 | 100.0 | 100.0 | 97.7 | 100.0 | 100.0 | 79.3 | 81.5 | 81.8 | 83.1 | 82.9 | 16                              | Bucl4_Bm 2000031281.seq        |                                |
| 17 | 1.3  | 0.9  | 0.6  | 0.7  | 1.5  | 0.6   | 1.0  | 1.2  | 1.8  | 1.9  | 0.9   | 8.7  | 1.4  | 1.6  | 1.3  | 0.2  |      | 96.7 | 94.9 | 99.0  | 97.3 | 97.6 | 97.2 | 91.2 | 99.0  | 99.0  | 98.5 | 99.0  | 99.0  | 79.3 | 80.7 | 81.8 | 82.2 | 82.1 | 17                              | A5TN55_BURMA_Bm_2002721280.seq |                                |
| 18 | 0.9  | 1.1  | 1.4  | 1.3  | 0.6  | 1.4   | 0.9  | 1.8  | 2.2  | 1.0  | 1.1   | 10.5 | 1.4  | 1.3  | 1.8  | 1.0  | 1.1  |      | 98.0 | 96.0  | 98.9 | 98.9 | 94.0 | 94.1 | 96.0  | 96.0  | 97.7 | 96.0  | 96.0  | 80.0 | 78.3 | 80.0 | 79.5 | 79.4 | 18                              | Bucl4_Bm A188.seq              |                                |
| 19 | 1.0  | 1.1  | 1.5  | 1.3  | 0.5  | 1.5   | 1.0  | 2.0  | 2.4  | 1.2  | 1.1   | 11.8 | 1.4  | 1.5  | 2.0  | 1.2  | 1.3  | 0.5  |      | 94.2  | 97.5 | 97.1 | 92.3 | 95.8 | 94.2  | 94.2  | 96.0 | 94.2  | 94.2  | 79.9 | 76.7 | 78.2 | 77.9 | 77.6 | 19                              | Bucl4_Bm A193.seq              |                                |
| 20 | 1.1  | 0.9  | 0.5  | 0.6  | 1.4  | 0.5   | 0.9  | 1.2  | 1.5  | 1.7  | 0.9   | 8.1  | 1.3  | 1.3  | 1.0  | 0.0  | 0.2  | 1.0  | 1.2  |       | 96.7 | 96.8 | 97.8 | 90.6 | 100.0 | 100.0 | 97.7 | 100.0 | 100.0 | 79.3 | 81.5 | 81.8 | 83.1 | 82.9 | 20                              | Bucl4_Bm China 7.seq           |                                |
| 21 | 1.0  | 1.1  | 1.5  | 1.3  | 0.4  | 1.5   | 1.0  | 1.9  | 2.4  | 1.1  | 1.1   | 10.0 | 1.3  | 1.4  | 1.9  | 1.1  | 1.3  | 0.4  | 0.2  | 1.1   |      | 99.5 | 94.7 | 93.4 | 96.7  | 96.7  | 98.3 | 96.7  | 96.7  | 79.3 | 79.1 | 80.6 | 80.1 | 80.0 | 21                              | Bucl4_Bm PRL-20.seq            |                                |
| 22 | 1.0  | 1.1  | 1.1  | 1.3  | 0.9  | 1.1   | 0.7  | 1.5  | 2.2  | 1.3  | 1.1   | 9.7  | 1.3  | 1.2  | 1.7  | 1.0  | 0.9  | 0.4  | 0.6  | 1.0   | 0.6  |      | 94.9 | 93.1 | 96.8  | 96.8  | 98.9 | 96.8  | 96.8  | 79.5 | 79.1 | 80.8 | 80.4 | 80.3 | 22                              | Bucl4_Bm strain_11.seq         |                                |
| 23 | 1.4  | 0.6  | 1.1  | 0.8  | 2.0  | 1.1   | 1.5  | 0.9  | 1.2  | 2.1  | 0.6   | 7.3  | 1.5  | 1.7  | 1.5  | 0.7  | 0.5  | 1.5  | 1.6  | 0.7   | 1.6  | 1.3  |      | 89.0 | 97.8  | 97.8  | 95.9 | 97.8  | 97.8  | 79.0 | 83.4 | 81.5 | 83.1 | 84.7 | 23                              | A2S1C1_BURM9_Bm NCTC 10229.seq |                                |
| 24 | 1.6  | 1.1  | 1.5  | 1.3  | 0.6  | 1.5   | 1.0  | 2.5  | 3.1  | 2.1  | 1.1   | 14.4 | 2.3  | 2.2  | 2.8  | 1.8  | 2.0  | 1.4  | 1.1  | 1.8   | 1.2  | 1.6  | 1.8  |      | 90.6  | 90.6  | 92.2 | 90.6  | 90.6  | 79.2 | 73.6 | 74.5 | 74.1 | 74.3 | 24                              | Bucl4_Bm NCTC 10247.seq        |                                |
| 25 | 1.1  | 0.9  | 0.5  | 0.6  | 1.4  | 0.5   | 0.9  | 1.2  | 1.5  | 1.7  | 0.9   | 8.1  | 1.3  | 1.3  | 1.0  | 0.0  | 0.2  | 1.0  | 1.2  | 0.0   | 1.1  | 1.0  | 0.7  | 1.8  |       | 100.0 | 97.7 | 100.0 | 100.0 | 79.3 | 81.5 | 81.8 | 83.1 | 82.9 | 25                              | Bucl4_Bm FMH.seq               |                                |
| 26 | 1.1  | 0.9  | 0.5  | 0.6  | 1.4  | 0.5   | 0.9  | 1.2  | 1.5  | 1.7  | 0.9   | 8.1  | 1.3  | 1.3  | 1.0  | 0.0  | 0.2  | 1.0  | 1.2  | 0.0   | 1.1  | 1.0  | 0.7  | 1.8  | 0.0   |       | 97.7 | 100.0 | 100.0 | 79.3 | 81.5 | 81.8 | 83.1 | 82.9 | 26                              | A5XLG9_BURMA_Bm JHU.seq        |                                |
| 27 | 1.1  | 1.1  | 0.9  | 1.1  | 1.1  | 0.9   | 0.5  | 1.4  | 1.9  | 1.4  | 1.1   | 9.0  | 1.2  | 0.9  | 1.4  | 0.8  | 0.8  | 0.8  | 1.0  | 0.8   | 1.0  | 0.4  | 1.1  | 1.7  | 0.8   | 0.8   | 0.8  |       | 97.7  | 97.7 | 79.5 | 79.9 | 81.7 | 81.4 | 81.2                            | 27                             | A9K4R2_BURMA_Bm ATCC 10399.seq |
| 28 | 1.1  | 0.9  | 0.5  | 0.6  | 1.4  | 0.5   | 0.9  | 1.2  | 1.5  | 1.7  | 0.9   | 8.1  | 1.3  | 1.3  | 1.0  | 0.0  | 0.2  | 1.0  | 1.2  | 0.0   | 1.1  | 1.0  | 0.7  | 1.8  | 0.0   | 0.8   |      | 100.0 | 79.3  | 81.5 | 81.8 | 83.1 | 82.9 | 28   | C4AZL9_BURMA_Bm GB8 horse 4.seq |                                |                                |
| 29 | 1.1  | 0.9  | 0.5  | 0.6  | 1.4  | 0.5   | 0.9  | 1.2  | 1.5  | 1.7  | 0.9   | 8.1  | 1.3  | 1.3  | 1.0  | 0.0  | 0.2  | 1.0  | 1.2  | 0.0   | 1.1  | 1.0  | 0.7  | 1.8  | 0.0   | 0.0   | 0.8  | 0.0   |       | 79.3 | 81.5 | 81.8 | 83.1 | 82.9 | 29                              | Q62AR6_BURMA_Bm ATCC 23344.seq |                                |
| 30 | 21.7 | 13.1 | 16.5 | 14.8 | 19.6 | 16.5  | 17.0 | 18.1 | 21.6 | 23.4 | 13.1  | 20.5 | 22.1 | 22.7 | 22.3 | 19.3 | 20.3 | 22.4 | 23.5 | 19.3  | 22.3 | 22.1 | 17.6 | 24.5 | 19.3  | 19.3  | 21.1 | 19.3  | 19.3  |      | 81.6 | 97.0 | 95.2 | 91.8 | 30                              | Bucl4_Bt E264.seq              |                                |
| 31 | 12.3 | 11.9 | 12.4 | 12.3 | 12.1 | 12.4  | 12.3 | 11.9 | 12.1 | 12.7 | 11.9  | 12.7 | 12.5 | 12.5 | 12.7 | 12.3 | 12.3 | 12.3 | 12.3 | 12.3  | 12.3 | 12.3 | 11.7 | 12.3 | 12.3  | 12.3  | 12.3 | 12.3  | 12.3  | 6.5  |      | 86.3 | 87.8 | 90.8 | 31                              | Bucl4_Bt MSMB121.seq           |                                |
| 32 | 20.5 | 13.2 | 16.6 | 14.9 | 19.6 | 16.6  | 17.1 | 18.1 | 19.3 | 20.9 | 13.2  | 18.8 | 20.7 | 20.3 | 19.9 | 19.3 | 20.3 | 20.9 | 21.2 | 19.3  | 21.2 | 20.9 | 17.7 | 22.1 | 19.3  | 19.3  | 20.7 | 19.3  | 19.3  | 0.0  | 6.8  |      | 98.4 | 95.5 | 32                              | Bucl4_Bt 2002721723.seq        |                                |
| 33 | 19.3 | 13.2 | 16.6 | 14.9 | 19.6 | 16.6  | 17.1 | 18.1 | 18.2 | 19.7 | 13.2  | 17.9 | 19.3 | 19.1 | 18.7 | 18.9 | 19.2 | 19.6 | 19.7 | 18.9  | 19.9 | 19.5 | 17.7 | 20.7 | 18.9  | 18.9  | 19.2 | 18.9  | 18.9  | 0.0  | 6.8  | 0.0  |      | 97.0 | 33                              | Bucl4_Bt E444.seq              |                                |
| 34 | 16.9 | 12.6 | 15.9 | 14.3 | 17.3 | 15.9  | 16.4 | 15.7 | 15.7 | 17.2 | 12.6  | 15.8 | 16.9 | 16.6 | 16.2 | 16.2 | 16.3 | 16.9 | 17.1 | 16.2  | 17.1 | 16.6 | 15.9 | 17.4 | 16.2  | 16.2  | 16.5 | 16.2  | 16.2  | 0.7  | 5.9  | 0.7  | 0.7  |      | 34                              | Bucl4_Bt H0587.seq             |                                |

*bucl4*

Percent Identity

|           | 1        | 2        | 3        | 4        | 5        | 6        | 7        | 8        | 9        | 10        | 11        | 12        | 13        | 14        | 15        | 16        | 17        | 18        | 19        | 20        | 21        | 22        | 23        | 24        | 25        | 26        | 27        | 28        | 29        |           |                                 |
|-----------|----------|----------|----------|----------|----------|----------|----------|----------|----------|-----------|-----------|-----------|-----------|-----------|-----------|-----------|-----------|-----------|-----------|-----------|-----------|-----------|-----------|-----------|-----------|-----------|-----------|-----------|-----------|-----------|---------------------------------|
| <b>1</b>  | ████     | 86.8     | 84.6     | 87.6     | 97.0     | 82.9     | 84.2     | 79.1     | 83.8     | 83.8      | 86.8      | 83.8      | 76.5      | 85.9      | 83.3      | 85.5      | 92.7      | 85.9      | 89.3      | 93.2      | 85.0      | 84.6      | 90.6      | 85.9      | 85.9      | 90.2      | 85.9      | 85.9      | 87.6      | <b>1</b>  | Bucl5_Bps K96243.seq            |
| <b>2</b>  | 5.9      | ████     | 88.5     | 83.8     | 87.6     | 87.6     | 87.2     | 83.8     | 86.8     | 86.8      | 99.6      | 86.8      | 82.5      | 93.2      | 91.0      | 93.2      | 88.9      | 93.2      | 90.6      | 88.9      | 94.4      | 80.8      | 85.0      | 93.2      | 93.2      | 89.7      | 93.2      | 93.2      | 94.4      | <b>2</b>  | Bucl5_Bps MSHR305.seq           |
| <b>3</b>  | 7.9      | 9.1      | ████     | 79.1     | 83.3     | 97.9     | 95.7     | 86.8     | 92.3     | 92.3      | 88.5      | 92.3      | 86.3      | 92.3      | 93.2      | 92.7      | 85.9      | 92.3      | 88.0      | 85.9      | 91.5      | 76.1      | 82.1      | 92.3      | 92.3      | 86.8      | 92.3      | 92.3      | 91.0      | <b>3</b>  | Bucl5_Bps 1106a.seq             |
| <b>4</b>  | 8.8      | 3.8      | 9.2      | ████     | 89.3     | 79.9     | 79.5     | 73.9     | 78.2     | 78.2      | 83.8      | 78.2      | 77.8      | 82.5      | 78.2      | 82.5      | 87.6      | 82.5      | 85.5      | 87.2      | 82.1      | 85.9      | 92.7      | 82.5      | 82.5      | 86.8      | 82.5      | 82.5      | 84.6      | <b>4</b>  | Bucl5_Bps 1026b.seq             |
| <b>5</b>  | 2.9      | 4.8      | 9.7      | 6.6      | ████     | 81.6     | 82.9     | 79.9     | 82.5     | 82.5      | 87.6      | 82.5      | 77.4      | 87.2      | 83.3      | 86.8      | 92.7      | 87.2      | 90.6      | 93.2      | 86.3      | 84.6      | 90.6      | 87.2      | 87.2      | 91.5      | 87.2      | 87.2      | 88.9      | <b>5</b>  | Q3JHM0_BURP1_Bucl5_Bp 1710b.seq |
| <b>6</b>  | 7.9      | 9.1      | 0.0      | 9.1      | 9.7      | ████     | 96.6     | 85.0     | 90.6     | 90.6      | 87.6      | 90.6      | 87.2      | 91.5      | 92.3      | 91.9      | 85.0      | 91.5      | 86.3      | 85.0      | 90.6      | 75.2      | 81.2      | 91.5      | 91.5      | 85.9      | 91.5      | 91.5      | 89.3      | <b>6</b>  | Bucl5_Bps BPC006.seq            |
| <b>7</b>  | 6.7      | 9.1      | 3.3      | 10.3     | 8.5      | 3.2      | ████     | 85.0     | 90.2     | 90.2      | 87.2      | 90.2      | 86.3      | 89.3      | 89.3      | 89.7      | 82.9      | 89.3      | 85.0      | 82.9      | 88.5      | 73.1      | 79.1      | 89.3      | 89.3      | 83.8      | 89.3      | 89.3      | 88.0      | <b>7</b>  | Bucl5_Bps 668.seq               |
| <b>8</b>  | 4.9      | 4.9      | 6.9      | 5.6      | 3.7      | 6.9      | 7.5      | ████     | 91.5     | 91.5      | 83.8      | 91.5      | 88.9      | 86.3      | 88.0      | 86.8      | 80.3      | 86.3      | 84.2      | 80.3      | 85.9      | 70.5      | 76.5      | 86.3      | 86.3      | 81.6      | 86.3      | 86.3      | 85.5      | <b>8</b>  | Bucl5_Bps NCTC 13179.seq        |
| <b>9</b>  | 4.6      | 7.0      | 5.2      | 8.3      | 6.4      | 5.2      | 6.4      | 2.5      | ████     | 99.6      | 86.8      | 99.6      | 88.9      | 88.9      | 92.3      | 89.7      | 83.3      | 88.9      | 86.3      | 83.3      | 88.5      | 73.5      | 79.5      | 88.9      | 88.9      | 84.6      | 88.9      | 88.9      | 88.5      | <b>9</b>  | Bucl5_Bps MSHR146.seq           |
| <b>10</b> | 4.6      | 7.0      | 5.2      | 8.3      | 6.4      | 5.2      | 6.4      | 2.5      | 0.0      | ████      | 86.8      | 99.6      | 88.9      | 88.9      | 92.3      | 89.7      | 83.3      | 88.9      | 86.3      | 83.3      | 88.5      | 73.5      | 79.5      | 88.9      | 88.9      | 84.6      | 88.9      | 88.9      | 88.5      | <b>10</b> | Bucl5_Bps MSHR511.seq           |
| <b>11</b> | 5.9      | 0.0      | 9.1      | 3.8      | 4.8      | 9.1      | 9.1      | 4.9      | 7.0      | 7.0       | ████      | 86.8      | 82.5      | 93.2      | 91.0      | 93.2      | 88.9      | 93.2      | 90.6      | 88.9      | 94.4      | 80.8      | 85.0      | 93.2      | 93.2      | 89.7      | 93.2      | 93.2      | 94.4      | <b>11</b> | Bucl5_Bps MSHR520.seq           |
| <b>12</b> | 4.6      | 7.0      | 5.2      | 8.3      | 6.4      | 5.2      | 6.4      | 2.5      | 0.0      | 0.0       | 7.0       | ████      | 88.9      | 88.9      | 92.3      | 89.7      | 83.3      | 88.9      | 86.3      | 83.3      | 88.5      | 73.5      | 79.5      | 88.9      | 88.9      | 84.6      | 88.9      | 88.9      | 88.5      | <b>12</b> | Bucl5_Bps NAU20B-16.seq         |
| <b>13</b> | 8.1      | 6.1      | 6.8      | 5.4      | 6.8      | 6.7      | 8.6      | 6.4      | 8.1      | 8.1       | 6.1       | 8.1       | ████      | 85.9      | 87.2      | 85.5      | 79.1      | 85.9      | 82.5      | 79.1      | 84.6      | 69.2      | 75.2      | 85.9      | 85.9      | 80.3      | 85.9      | 85.9      | 85.0      | <b>13</b> | Bucl5_Bps NCTC 13178.seq        |
| <b>14</b> | 6.6      | 5.4      | 6.7      | 5.0      | 4.9      | 6.7      | 9.1      | 4.3      | 7.0      | 7.0       | 5.4       | 7.0       | 4.2       | ████      | 93.2      | 98.7      | 90.2      | 99.6      | 90.6      | 90.2      | 98.3      | 80.3      | 86.3      | 99.6      | 99.6      | 91.0      | 99.6      | 99.6      | 95.7      | <b>14</b> | Bucl5_Bm 2000031281.seq         |
| <b>15</b> | 5.7      | 6.1      | 4.5      | 6.3      | 5.7      | 4.5      | 8.0      | 4.3      | 4.6      | 4.6       | 6.1       | 4.6       | 4.9       | 3.9       | ████      | 93.6      | 87.2      | 93.2      | 88.5      | 87.2      | 94.0      | 79.1      | 83.3      | 93.2      | 93.2      | 88.9      | 93.2      | 93.2      | 90.2      | <b>15</b> | Bucl5_Bm 2002721280.seq         |
| <b>16</b> | 7.2      | 5.4      | 6.1      | 5.0      | 5.5      | 6.1      | 8.5      | 3.7      | 5.8      | 5.8       | 5.4       | 5.8       | 4.9       | 1.0       | 3.3       | ████      | 91.0      | 98.7      | 91.0      | 91.0      | 98.3      | 81.2      | 87.2      | 98.7      | 98.7      | 91.9      | 98.7      | 98.7      | 94.9      | <b>16</b> | Bucl5_Bm A188.seq               |
| <b>17</b> | 5.6      | 5.9      | 6.7      | 6.2      | 5.6      | 6.7      | 9.1      | 3.7      | 5.8      | 5.8       | 5.9       | 5.8       | 4.9       | 3.7       | 3.3       | 2.7       | ████      | 90.2      | 91.9      | 98.3      | 89.7      | 87.2      | 92.7      | 90.2      | 90.2      | 96.2      | 90.2      | 90.2      | 89.7      | <b>17</b> | Bucl5_Bm A193.seq               |
| <b>18</b> | 6.6      | 5.4      | 6.7      | 5.0      | 4.9      | 6.7      | 9.1      | 4.3      | 7.0      | 7.0       | 5.4       | 7.0       | 4.2       | 0.0       | 3.9       | 1.0       | 3.7       | ████      | 90.6      | 90.2      | 98.3      | 80.3      | 86.3      | 99.6      | 99.6      | 91.0      | 99.6      | 99.6      | 95.7      | <b>18</b> | Bucl5_Bm China 7.seq            |
| <b>19</b> | 8.0      | 5.9      | 8.5      | 6.9      | 6.3      | 8.5      | 10.9     | 3.0      | 6.4      | 6.4       | 5.9       | 6.4       | 4.9       | 5.5       | 3.9       | 4.9       | 5.2       | 5.5       | ████      | 91.9      | 90.2      | 82.5      | 88.5      | 90.6      | 90.6      | 94.4      | 90.6      | 90.6      | 92.7      | <b>19</b> | Bucl5_Bm PRL-20.seq             |
| <b>20</b> | 5.1      | 5.9      | 6.7      | 6.7      | 5.1      | 6.7      | 9.1      | 3.7      | 5.8      | 5.8       | 5.9       | 5.8       | 4.9       | 3.7       | 3.3       | 2.7       | 1.5       | 3.7       | 5.2       | ████      | 89.7      | 87.6      | 93.2      | 90.2      | 90.2      | 94.9      | 90.2      | 90.2      | 89.7      | <b>20</b> | Bucl5_Bm strain_6.seq           |
| <b>21</b> | 6.6      | 4.8      | 6.7      | 4.4      | 4.9      | 6.7      | 9.1      | 3.7      | 6.4      | 6.4       | 4.8       | 6.4       | 4.9       | 0.5       | 3.8       | 0.5       | 3.2       | 0.5       | 4.9       | 3.2       | ████      | 81.6      | 85.9      | 98.3      | 98.3      | 90.6      | 98.3      | 98.3      | 94.4      | <b>21</b> | Bucl5_Bm strain_11.seq          |
| <b>22</b> | 6.5      | 5.8      | 6.7      | 5.4      | 6.5      | 6.7      | 9.1      | 3.7      | 5.8      | 5.8       | 5.8       | 5.8       | 4.9       | 3.7       | 3.3       | 2.7       | 3.0       | 3.7       | 4.7       | 2.5       | 3.2       | ████      | 91.0      | 80.3      | 80.3      | 85.5      | 80.3      | 80.3      | 79.9      | <b>22</b> | Bucl5_Bm NCTC 10229.seq         |
| <b>23</b> | 6.5      | 5.9      | 6.7      | 4.4      | 6.5      | 6.7      | 9.1      | 3.7      | 5.8      | 5.8       | 5.9       | 5.8       | 4.9       | 3.7       | 3.3       | 2.7       | 3.5       | 3.7       | 4.7       | 3.0       | 3.2       | 2.8       | ████      | 86.3      | 86.3      | 91.5      | 86.3      | 86.3      | 85.9      | <b>23</b> | Bucl5_Bm NCTC 10247.seq         |
| <b>24</b> | 6.6      | 5.4      | 6.7      | 5.0      | 4.9      | 6.7      | 9.1      | 4.3      | 7.0      | 7.0       | 5.4       | 7.0       | 4.2       | 0.0       | 3.9       | 1.0       | 3.7       | 0.0       | 5.5       | 3.7       | 0.5       | 3.7       | 3.7       | ████      | 99.6      | 91.0      | 99.6      | 99.6      | 95.7      | <b>24</b> | Bucl5_Bm FMH.seq                |
| <b>25</b> | 6.6      | 5.4      | 6.7      | 5.0      | 4.9      | 6.7      | 9.1      | 4.3      | 7.0      | 7.0       | 5.4       | 7.0       | 4.2       | 0.0       | 3.9       | 1.0       | 3.7       | 0.0       | 5.5       | 3.7       | 0.5       | 3.7       | 3.7       | 0.0       | ████      | 91.0      | 99.6      | 99.6      | 95.7      | <b>25</b> | Bucl5_Bm JHU.seq                |
| <b>26</b> | 7.3      | 6.4      | 7.3      | 5.7      | 5.7      | 7.3      | 9.7      | 3.7      | 5.8      | 5.8       | 6.4       | 5.8       | 4.9       | 4.3       | 2.7       | 3.2       | 2.5       | 4.3       | 3.6       | 4.0       | 3.7       | 3.5       | 3.5       | 4.3       | 4.3       | ████      | 91.0      | 91.0      | 90.6      | <b>26</b> | Bucl5_Bm ATCC 10399.seq         |
| <b>27</b> | 6.6      | 5.4      | 6.7      | 5.0      | 4.9      | 6.7      | 9.1      | 4.3      | 7.0      | 7.0       | 5.4       | 7.0       | 4.2       | 0.0       | 3.9       | 1.0       | 3.7       | 0.0       | 5.5       | 3.7       | 0.5       | 3.7       | 3.7       | 0.0       | 0.0       | 4.3       | ████      | 99.6      | 95.7      | <b>27</b> | Bucl5_Bm GB8 horse 4.seq        |
| <b>28</b> | 6.6      | 5.4      | 6.7      | 5.0      | 4.9      | 6.7      | 9.1      | 4.3      | 7.0      | 7.0       | 5.4       | 7.0       | 4.2       | 0.0       | 3.9       | 1.0       | 3.7       | 0.0       | 5.5       | 3.7       | 0.5       | 3.7       | 3.7       | 0.0       | 0.0       | 4.3       | 0.0       | ████      | 95.7      | <b>28</b> | Bucl5_Bm ATCC 23344.seq         |
| <b>29</b> | 7.1      | 4.3      | 7.9      | 4.9      | 5.4      | 7.9      | 10.3     | 4.9      | 7.0      | 7.0       | 4.3       | 7.0       | 4.9       | 2.1       | 5.1       | 3.2       | 4.8       | 2.1       | 5.4       | 4.8       | 2.7       | 4.8       | 4.8       | 2.1       | 2.1       | 5.4       | 2.1       | 2.1       | ████      | <b>29</b> | Bucl5_Bm SAVP1.seq              |
|           | <b>1</b> | <b>2</b> | <b>3</b> | <b>4</b> | <b>5</b> | <b>6</b> | <b>7</b> | <b>8</b> | <b>9</b> | <b>10</b> | <b>11</b> | <b>12</b> | <b>13</b> | <b>14</b> | <b>15</b> | <b>16</b> | <b>17</b> | <b>18</b> | <b>19</b> | <b>20</b> | <b>21</b> | <b>22</b> | <b>23</b> | <b>24</b> | <b>25</b> | <b>26</b> | <b>27</b> | <b>28</b> | <b>29</b> |           |                                 |

bucl5

Percent Identity

|    | 1   | 2    | 3    | 4    | 5    | 6    | 7     | 8    | 9    | 10   | 11    | 12    | 13    | 14   | 15   | 16   | 17    | 18   | 19    | 20   | 21   | 22   | 23   | 24   | 25    | 26    | 27   | 28    | 29    | 30    |    |                               |
|----|-----|------|------|------|------|------|-------|------|------|------|-------|-------|-------|------|------|------|-------|------|-------|------|------|------|------|------|-------|-------|------|-------|-------|-------|----|-------------------------------|
| 1  | █   | 80.9 | 95.1 | 64.0 | 44.2 | 63.7 | 95.1  | 56.6 | 76.0 | 98.9 | 98.9  | 80.9  | 98.9  | 52.1 | 50.2 | 56.6 | 56.6  | 53.2 | 50.2  | 60.3 | 46.8 | 43.1 | 49.8 | 53.6 | 50.2  | 50.2  | 63.3 | 50.2  | 50.2  | 60.3  | 1  | Bucl6_Bps K96243.seq          |
| 2  | 5.1 | █    | 85.0 | 77.9 | 61.8 | 80.1 | 85.0  | 71.5 | 92.1 | 82.0 | 82.0  | 100.0 | 82.0  | 68.9 | 66.7 | 73.0 | 73.0  | 69.7 | 66.7  | 77.2 | 63.3 | 59.2 | 66.3 | 70.0 | 66.7  | 66.7  | 80.1 | 66.7  | 66.7  | 77.2  | 2  | Bucl6_Bps MSHR 305.seq        |
| 3  | 3.3 | 3.1  | █    | 66.3 | 48.3 | 67.4 | 100.0 | 59.6 | 78.3 | 95.5 | 95.5  | 85.0  | 95.5  | 55.8 | 53.9 | 60.3 | 60.3  | 56.9 | 53.9  | 64.0 | 50.6 | 46.4 | 53.6 | 57.3 | 53.9  | 53.9  | 67.0 | 53.9  | 53.9  | 64.0  | 3  | Bucl6_Bps 1106a.seq           |
| 4  | 5.0 | 8.9  | 7.2  | █    | 73.0 | 95.9 | 66.3  | 87.6 | 74.5 | 63.7 | 63.7  | 77.9  | 63.7  | 83.1 | 82.4 | 88.4 | 88.4  | 85.0 | 82.4  | 91.0 | 78.7 | 74.2 | 81.3 | 85.8 | 82.4  | 82.4  | 94.8 | 82.4  | 82.4  | 91.0  | 4  | Bucl6_Bps MSHR 346.seq        |
| 5  | 4.2 | 1.8  | 2.3  | 9.0  | █    | 74.2 | 48.3  | 80.1 | 55.4 | 45.3 | 45.3  | 61.8  | 45.3  | 76.4 | 87.6 | 80.1 | 80.1  | 83.5 | 87.6  | 78.7 | 90.3 | 94.0 | 87.3 | 84.3 | 87.6  | 87.6  | 75.3 | 87.6  | 87.6  | 78.7  | 5  | Bucl6_Bps 1026b.seq           |
| 6  | 5.9 | 4.9  | 4.7  | 5.4  | 7.4  | █    | 67.4  | 86.5 | 75.3 | 64.8 | 64.8  | 80.1  | 64.8  | 86.5 | 84.3 | 91.0 | 91.0  | 87.6 | 84.3  | 93.6 | 81.3 | 77.5 | 84.6 | 87.6 | 84.3  | 84.3  | 97.4 | 84.3  | 84.3  | 93.6  | 6  | Bucl6_Bps 1710b.seq           |
| 7  | 3.3 | 3.1  | 0.0  | 7.2  | 2.3  | 4.7  | █     | 59.6 | 78.3 | 95.5 | 95.5  | 85.0  | 95.5  | 55.8 | 53.9 | 60.3 | 60.3  | 56.9 | 53.9  | 64.0 | 50.6 | 46.4 | 53.6 | 57.3 | 53.9  | 53.9  | 67.0 | 53.9  | 53.9  | 64.0  | 7  | Bucl6_Bps BPC006.seq          |
| 8  | 6.8 | 8.2  | 7.2  | 7.4  | 7.8  | 9.0  | 7.2   | █    | 67.4 | 56.9 | 56.9  | 71.5  | 56.9  | 88.0 | 87.3 | 94.0 | 94.0  | 89.9 | 87.3  | 91.4 | 83.5 | 79.0 | 86.1 | 90.6 | 87.3  | 87.3  | 87.6 | 87.3  | 87.3  | 91.4  | 8  | A3N8K6_BURP6_Bucl6_Bp 668.seq |
| 9  | 5.7 | 5.4  | 8.0  | 6.8  | 4.7  | 5.4  | 8.0   | 7.5  | █    | 75.7 | 75.7  | 92.1  | 75.7  | 73.8 | 61.8 | 68.2 | 68.2  | 64.8 | 61.8  | 72.3 | 58.4 | 54.3 | 61.4 | 65.2 | 61.8  | 61.8  | 75.3 | 61.8  | 61.8  | 72.3  | 9  | Bucl6_Bps NCTC 13179.seq      |
| 10 | 2.5 | 2.5  | 2.5  | 6.0  | 1.6  | 3.3  | 2.5   | 5.9  | 6.7  | █    | 100.0 | 82.0  | 100.0 | 53.2 | 51.3 | 57.7 | 57.7  | 54.3 | 51.3  | 61.4 | 47.9 | 44.2 | 50.9 | 54.7 | 51.3  | 51.3  | 64.4 | 51.3  | 51.3  | 61.4  | 10 | Bucl6_Bps MSHR146.seq         |
| 11 | 2.5 | 2.5  | 2.5  | 6.0  | 1.6  | 3.3  | 2.5   | 5.9  | 6.7  | 0.0  | █     | 82.0  | 100.0 | 53.2 | 51.3 | 57.7 | 57.7  | 54.3 | 51.3  | 61.4 | 47.9 | 44.2 | 50.9 | 54.7 | 51.3  | 51.3  | 64.4 | 51.3  | 51.3  | 61.4  | 11 | Bucl6_Bps MSHR511.seq         |
| 12 | 5.1 | 0.0  | 3.1  | 8.9  | 1.8  | 4.9  | 3.1   | 8.2  | 5.4  | 2.5  | 2.5   | █     | 82.0  | 68.9 | 66.7 | 73.0 | 73.0  | 69.7 | 66.7  | 77.2 | 63.3 | 59.2 | 66.3 | 70.0 | 66.7  | 66.7  | 80.1 | 66.7  | 66.7  | 77.2  | 12 | Bucl6_Bps MSHR520.seq         |
| 13 | 2.5 | 2.5  | 2.5  | 6.0  | 1.6  | 3.3  | 2.5   | 5.9  | 6.7  | 0.0  | 0.0   | 2.5   | █     | 53.2 | 51.3 | 57.7 | 57.7  | 54.3 | 51.3  | 61.4 | 47.9 | 44.2 | 50.9 | 54.7 | 51.3  | 51.3  | 64.4 | 51.3  | 51.3  | 61.4  | 13 | Bucl6_Bps NAU20B-16.seq       |
| 14 | 6.7 | 4.7  | 5.2  | 7.4  | 6.7  | 2.5  | 5.2   | 9.3  | 4.7  | 3.7  | 3.7   | 4.7   | 3.7   | █    | 85.8 | 91.8 | 91.8  | 89.1 | 85.8  | 87.6 | 82.8 | 79.0 | 86.1 | 89.1 | 85.8  | 85.8  | 83.9 | 85.8  | 85.8  | 87.6  | 14 | Bucl6_Bps NCTC 13178.seq      |
| 15 | 5.9 | 4.9  | 4.7  | 5.4  | 6.3  | 2.9  | 4.7   | 7.3  | 5.4  | 3.3  | 3.3   | 4.9   | 3.3   | 3.3  | █    | 91.0 | 91.0  | 94.4 | 100.0 | 87.6 | 94.8 | 90.3 | 98.1 | 95.9 | 100.0 | 100.0 | 83.9 | 100.0 | 100.0 | 87.6  | 15 | Bucl6_Bm 2000031281.seq       |
| 16 | 6.8 | 5.6  | 5.5  | 6.5  | 7.7  | 2.9  | 5.5   | 7.3  | 6.1  | 4.2  | 4.2   | 5.6   | 4.2   | 4.2  | 2.6  | █    | 100.0 | 95.9 | 91.0  | 93.6 | 88.8 | 84.3 | 91.4 | 94.4 | 91.0  | 91.0  | 90.6 | 91.0  | 91.0  | 93.6  | 16 | Bucl6_Bm 2002721280.seq       |
| 17 | 6.8 | 5.6  | 5.5  | 6.5  | 7.7  | 2.9  | 5.5   | 7.3  | 6.1  | 4.2  | 4.2   | 5.6   | 4.2   | 4.2  | 2.6  | 0.0  | █     | 95.9 | 91.0  | 93.6 | 88.8 | 84.3 | 91.4 | 94.4 | 91.0  | 91.0  | 90.6 | 91.0  | 91.0  | 93.6  | 17 | Bucl6_Bm A188.seq             |
| 18 | 6.8 | 5.6  | 5.5  | 6.5  | 7.4  | 2.9  | 5.5   | 8.3  | 6.1  | 4.2  | 4.2   | 5.6   | 4.2   | 3.3  | 2.5  | 0.9  | 0.9   | █    | 94.4  | 90.3 | 92.1 | 87.6 | 94.8 | 98.5 | 94.4  | 94.4  | 87.3 | 94.4  | 94.4  | 90.3  | 18 | Bucl6_Bm A193.seq             |
| 19 | 5.9 | 4.9  | 4.7  | 5.4  | 6.3  | 2.9  | 4.7   | 7.3  | 5.4  | 3.3  | 3.3   | 4.9   | 3.3   | 3.3  | 0.0  | 2.6  | 2.6   | 2.5  | █     | 87.6 | 94.8 | 90.3 | 98.1 | 95.9 | 100.0 | 100.0 | 83.9 | 100.0 | 100.0 | 87.6  | 19 | Bucl6_Bm China 7.seq          |
| 20 | 5.9 | 4.3  | 4.7  | 7.4  | 5.6  | 3.9  | 4.7   | 6.6  | 4.7  | 3.3  | 3.3   | 4.3   | 3.3   | 5.5  | 2.8  | 3.7  | 3.7   | 3.7  | 2.8   | █    | 83.9 | 79.4 | 86.5 | 91.0 | 87.6  | 87.6  | 95.5 | 87.6  | 87.6  | 100.0 | 20 | Bucl6_Bm PRL-20.seq           |
| 21 | 5.9 | 4.9  | 4.7  | 5.9  | 6.9  | 2.4  | 4.7   | 7.8  | 5.4  | 3.3  | 3.3   | 4.9   | 3.3   | 2.8  | 2.0  | 1.3  | 1.3   | 1.3  | 2.0   | 3.2  | █    | 94.0 | 94.4 | 91.4 | 94.8  | 94.8  | 80.1 | 94.8  | 94.8  | 83.9  | 21 | Bucl6_Bm strain_6.seq         |
| 22 | 6.8 | 6.2  | 6.3  | 7.5  | 6.2  | 2.9  | 6.3   | 9.3  | 6.8  | 4.2  | 4.2   | 6.2   | 4.2   | 3.3  | 3.3  | 2.6  | 2.6   | 2.5  | 3.3   | 4.7  | 2.8  | █    | 92.1 | 86.9 | 90.3  | 90.3  | 76.4 | 90.3  | 90.3  | 79.4  | 22 | Bucl6_Bm strain_11.seq        |
| 23 | 6.8 | 5.6  | 5.5  | 7.0  | 6.7  | 2.4  | 5.5   | 8.8  | 6.1  | 4.2  | 4.2   | 5.6   | 4.2   | 2.8  | 2.0  | 2.2  | 2.2   | 2.1  | 2.0   | 4.2  | 2.5  | 1.2  | █    | 94.0 | 98.1  | 98.1  | 83.5 | 98.1  | 98.1  | 86.5  | 23 | Bucl6_Bm NCTC 10229.seq       |
| 24 | 5.9 | 4.9  | 4.7  | 5.4  | 6.5  | 2.9  | 4.7   | 7.3  | 5.4  | 3.3  | 3.3   | 4.9   | 3.3   | 3.3  | 0.8  | 2.6  | 2.6   | 1.7  | 0.8   | 2.8  | 2.1  | 3.4  | 3.0  | █    | 95.9  | 95.9  | 87.3 | 95.9  | 95.9  | 91.0  | 24 | Bucl6_Bm NCTC 10247.seq       |
| 25 | 5.9 | 4.9  | 4.7  | 5.4  | 6.3  | 2.9  | 4.7   | 7.3  | 5.4  | 3.3  | 3.3   | 4.9   | 3.3   | 3.3  | 0.0  | 2.6  | 2.6   | 2.5  | 0.0   | 2.8  | 2.0  | 3.3  | 2.0  | 0.8  | █     | 100.0 | 83.9 | 100.0 | 100.0 | 87.6  | 25 | Bucl6_Bm FMH.seq              |
| 26 | 5.9 | 4.9  | 4.7  | 5.4  | 6.3  | 2.9  | 4.7   | 7.3  | 5.4  | 3.3  | 3.3   | 4.9   | 3.3   | 3.3  | 0.0  | 2.6  | 2.6   | 2.5  | 0.0   | 2.8  | 2.0  | 3.3  | 2.0  | 0.8  | 0.0   | █     | 83.9 | 100.0 | 100.0 | 87.6  | 26 | Bucl6_Bm JHU.seq              |
| 27 | 6.8 | 4.9  | 5.5  | 6.9  | 5.9  | 3.4  | 5.5   | 7.4  | 5.4  | 4.2  | 4.2   | 4.9   | 4.2   | 6.3  | 3.4  | 3.4  | 3.4   | 3.4  | 3.4   | 1.4  | 3.9  | 4.4  | 3.9  | 3.4  | 3.4   | 3.4   | █    | 83.9  | 83.9  | 95.5  | 27 | Bucl6_Bm ATCC 10399.seq       |
| 28 | 5.9 | 4.9  | 4.7  | 5.4  | 6.3  | 2.9  | 4.7   | 7.3  | 5.4  | 3.3  | 3.3   | 4.9   | 3.3   | 3.3  | 0.0  | 2.6  | 2.6   | 2.5  | 0.0   | 2.8  | 2.0  | 3.3  | 2.0  | 0.8  | 0.0   | 0.0   | 3.4  | █     | 100.0 | 87.6  | 28 | Bucl6_Bm GB8 horse 4.seq      |
| 29 | 5.9 | 4.9  | 4.7  | 5.4  | 6.3  | 2.9  | 4.7   | 7.3  | 5.4  | 3.3  | 3.3   | 4.9   | 3.3   | 3.3  | 0.0  | 2.6  | 2.6   | 2.5  | 0.0   | 2.8  | 2.0  | 3.3  | 2.0  | 0.8  | 0.0   | 0.0   | 3.4  | 0.0   | █     | 87.6  | 29 | Bucl6_Bm ATCC 23344.seq       |
| 30 | 5.9 | 4.3  | 4.7  | 7.4  | 5.6  | 3.9  | 4.7   | 6.6  | 4.7  | 3.3  | 3.3   | 4.3   | 3.3   | 5.5  | 2.8  | 3.7  | 3.7   | 3.7  | 2.8   | 0.0  | 3.2  | 4.7  | 4.2  | 2.8  | 2.8   | 2.8   | 1.4  | 2.8   | 2.8   | █     | 30 | Bucl6_Bm SAVP1.seq            |

*bucl6*

Percent Identity

|    | 1   | 2   | 3   | 4   | 5   | 6   | 7   | 8   | 9   | 10  | 11  | 12  | 13  | 14  | 15  | 16  | 17  | 18  | 19  | 20  | 21  | 22  | 23  | 24  | 25  | 26  | 27  |     |
|----|-----|-----|-----|-----|-----|-----|-----|-----|-----|-----|-----|-----|-----|-----|-----|-----|-----|-----|-----|-----|-----|-----|-----|-----|-----|-----|-----|-----|
| 1  |     |     |     |     |     |     |     |     |     |     |     |     |     |     |     |     |     |     |     |     |     |     |     |     |     |     |     |     |
| 2  | 4.4 |     |     |     |     |     |     |     |     |     |     |     |     |     |     |     |     |     |     |     |     |     |     |     |     |     |     |     |
| 3  | 4.4 | 7.6 |     |     |     |     |     |     |     |     |     |     |     |     |     |     |     |     |     |     |     |     |     |     |     |     |     |     |
| 4  | 3.8 | 4.2 | 5.3 |     |     |     |     |     |     |     |     |     |     |     |     |     |     |     |     |     |     |     |     |     |     |     |     |     |
| 5  | 3.3 | 4.3 | 4.9 | 4.3 |     |     |     |     |     |     |     |     |     |     |     |     |     |     |     |     |     |     |     |     |     |     |     |     |
| 6  | 4.4 | 7.6 | 0.0 | 5.3 | 4.9 |     |     |     |     |     |     |     |     |     |     |     |     |     |     |     |     |     |     |     |     |     |     |     |
| 7  | 3.8 | 3.8 | 5.5 | 3.8 | 3.8 | 5.5 |     |     |     |     |     |     |     |     |     |     |     |     |     |     |     |     |     |     |     |     |     |     |
| 8  | 3.8 | 3.2 | 4.2 | 2.1 | 3.2 | 4.2 | 2.7 |     |     |     |     |     |     |     |     |     |     |     |     |     |     |     |     |     |     |     |     |     |
| 9  | 4.4 | 2.1 | 6.5 | 4.2 | 3.2 | 6.5 | 2.7 | 2.1 |     |     |     |     |     |     |     |     |     |     |     |     |     |     |     |     |     |     |     |     |
| 10 | 4.4 | 2.1 | 6.5 | 4.2 | 3.2 | 6.5 | 2.7 | 2.1 | 0.0 |     |     |     |     |     |     |     |     |     |     |     |     |     |     |     |     |     |     |     |
| 11 | 4.4 | 0.0 | 7.6 | 4.2 | 4.3 | 7.6 | 3.8 | 3.2 | 2.1 | 2.1 |     |     |     |     |     |     |     |     |     |     |     |     |     |     |     |     |     |     |
| 12 | 4.4 | 2.1 | 6.5 | 4.2 | 3.2 | 6.5 | 2.7 | 2.1 | 0.0 | 0.0 | 2.1 |     |     |     |     |     |     |     |     |     |     |     |     |     |     |     |     |     |
| 13 | 3.8 | 3.7 | 5.3 | 4.8 | 3.8 | 5.3 | 2.7 | 2.6 | 2.6 | 2.6 | 3.7 | 2.6 |     |     |     |     |     |     |     |     |     |     |     |     |     |     |     |     |
| 14 | 3.3 | 3.2 | 4.9 | 5.4 | 2.1 | 4.9 | 3.8 | 4.3 | 3.2 | 3.2 | 3.2 | 3.2 | 2.7 |     |     |     |     |     |     |     |     |     |     |     |     |     |     |     |
| 15 | 3.3 | 3.2 | 4.9 | 5.4 | 2.1 | 4.9 | 3.8 | 4.3 | 3.2 | 3.2 | 3.2 | 3.2 | 2.7 | 0.0 |     |     |     |     |     |     |     |     |     |     |     |     |     |     |
| 16 | 3.3 | 3.2 | 4.9 | 5.4 | 2.1 | 4.9 | 3.8 | 4.3 | 3.2 | 3.2 | 3.2 | 3.2 | 2.7 | 0.0 | 0.0 |     |     |     |     |     |     |     |     |     |     |     |     |     |
| 17 | 3.3 | 3.2 | 4.9 | 5.4 | 2.1 | 4.9 | 3.8 | 4.3 | 3.2 | 3.2 | 3.2 | 3.2 | 2.7 | 0.0 | 0.0 | 0.0 |     |     |     |     |     |     |     |     |     |     |     |     |
| 18 | 3.3 | 3.2 | 4.9 | 5.4 | 2.1 | 4.9 | 3.8 | 4.3 | 3.2 | 3.2 | 3.2 | 3.2 | 2.7 | 0.0 | 0.0 | 0.0 | 0.0 |     |     |     |     |     |     |     |     |     |     |     |
| 19 | 3.3 | 3.2 | 4.9 | 5.4 | 2.1 | 4.9 | 3.8 | 4.3 | 3.2 | 3.2 | 3.2 | 3.2 | 2.7 | 0.0 | 0.0 | 0.0 | 0.0 | 0.0 |     |     |     |     |     |     |     |     |     |     |
| 20 | 3.3 | 3.2 | 4.9 | 5.4 | 2.1 | 4.9 | 3.8 | 4.3 | 3.2 | 3.2 | 3.2 | 3.2 | 2.7 | 0.0 | 0.0 | 0.0 | 0.0 | 0.0 | 0.0 |     |     |     |     |     |     |     |     |     |
| 21 | 3.3 | 3.2 | 4.9 | 5.4 | 2.1 | 4.9 | 3.8 | 4.3 | 3.2 | 3.2 | 3.2 | 3.2 | 2.7 | 0.0 | 0.0 | 0.0 | 0.0 | 0.0 | 0.0 | 0.0 |     |     |     |     |     |     |     |     |
| 22 | 3.3 | 3.2 | 4.9 | 5.4 | 2.1 | 4.9 | 3.8 | 4.3 | 3.2 | 3.2 | 3.2 | 3.2 | 2.7 | 0.0 | 0.0 | 0.0 | 0.0 | 0.0 | 0.0 | 0.0 | 0.0 |     |     |     |     |     |     |     |
| 23 | 3.3 | 3.2 | 4.9 | 5.4 | 2.1 | 4.9 | 3.8 | 4.3 | 3.2 | 3.2 | 3.2 | 3.2 | 2.7 | 0.0 | 0.0 | 0.0 | 0.0 | 0.0 | 0.0 | 0.0 | 0.0 | 0.0 |     |     |     |     |     |     |
| 24 | 3.3 | 3.2 | 4.9 | 5.4 | 2.1 | 4.9 | 3.8 | 4.3 | 3.2 | 3.2 | 3.2 | 3.2 | 2.7 | 0.0 | 0.0 | 0.0 | 0.0 | 0.0 | 0.0 | 0.0 | 0.0 | 0.0 | 0.0 |     |     |     |     |     |
| 25 | 3.3 | 2.1 | 5.3 | 4.2 | 3.2 | 5.3 | 3.8 | 3.2 | 2.1 | 2.1 | 2.1 | 2.1 | 2.6 | 1.1 | 1.1 | 1.1 | 1.1 | 1.1 | 1.1 | 1.1 | 1.1 | 1.1 | 1.1 | 1.1 | 1.1 | 1.1 | 1.1 | 1.1 |
| 26 | 3.3 | 3.2 | 4.9 | 5.4 | 2.1 | 4.9 | 3.8 | 4.3 | 3.2 | 3.2 | 3.2 | 3.2 | 2.7 | 0.0 | 0.0 | 0.0 | 0.0 | 0.0 | 0.0 | 0.0 | 0.0 | 0.0 | 0.0 | 0.0 | 0.0 | 0.0 | 1.1 | 1.1 |
| 27 | 3.3 | 3.2 | 4.9 | 5.4 | 2.1 | 4.9 | 3.8 | 4.3 | 3.2 | 3.2 | 3.2 | 3.2 | 2.7 | 0.0 | 0.0 | 0.0 | 0.0 | 0.0 | 0.0 | 0.0 | 0.0 | 0.0 | 0.0 | 0.0 | 0.0 | 0.0 | 1.1 | 1.1 |
| 1  | 2   | 3   | 4   | 5   | 6   | 7   | 8   | 9   | 10  | 11  | 12  | 13  | 14  | 15  | 16  | 17  | 18  | 19  | 20  | 21  | 22  | 23  | 24  | 25  | 26  | 27  |     |     |

Bud7\_Bps K96243.seq  
 Bud7\_Bps MSHR 305.seq  
 A3P4A7\_BURP0\_Bucl7\_Bp 1106a.seq  
 Bud7\_Bps 1026b.seq  
 Bud7\_Bps 1710b.seq  
 Bud7\_Bps BPC006.seq  
 Bud7\_Bps 668.seq  
 Bud7\_Bps NCTC 13179.seq  
 Bud7\_Bps MSHR146.seq  
 Bud7\_Bps MSHR511.seq  
 Bud7\_Bps MSHR520.seq  
 Bud7\_Bps NAU20B-16.seq  
 Bud7\_Bps NCTC 13178.seq  
 Bud7\_Bm 2000031281.seq  
 Bud7\_Bm 2002721280.seq  
 Bud7\_Bm A188.seq  
 Bud7\_Bm China 7.seq  
 Bud7\_Bm PRL-20.seq  
 Bud7\_Bm strain\_6.seq  
 Bud7\_Bm strain\_11.seq  
 Bud7\_Bm NCTC 10229.seq  
 Bud7\_Bm NCTC 10247.seq  
 Bud7\_Bm FMH.seq  
 Bud7\_Bm JHU.seq  
 Bud7\_Bm ATCC 10399.seq  
 Bud7\_Bm GB8 horse 4.seq  
 Bud7\_Bm ATCC 23344.seq

*bucl7*





Percent Identity

|    | 1   | 2    | 3    | 4    | 5    | 6    | 7    | 8    | 9    | 10   | 11   | 12   | 13   | 14   | 15   | 16   | 17   | 18   | 19   | 20   | 21   | 22   | 23    | 24   | 25   | 26   | 27   | 28   |    |
|----|-----|------|------|------|------|------|------|------|------|------|------|------|------|------|------|------|------|------|------|------|------|------|-------|------|------|------|------|------|----|
| 1  | █   | 98.0 | 88.7 | 93.8 | 79.8 | 94.0 | 81.5 | 94.0 | 81.5 | 95.6 | 83.3 | 79.8 | 81.5 | 87.5 | 96.0 | 92.3 | 83.3 | 86.9 | 92.3 | 86.9 | 78.0 | 85.1 | 92.3  | 88.7 | 97.6 | 76.2 | 79.8 | 70.8 | 1  |
| 2  | 0.3 | █    | 86.7 | 95.4 | 77.8 | 92.1 | 79.6 | 95.6 | 79.6 | 97.6 | 81.3 | 77.8 | 83.1 | 89.1 | 97.6 | 90.3 | 84.9 | 88.5 | 90.3 | 84.9 | 76.0 | 83.1 | 90.3  | 90.3 | 95.6 | 77.8 | 81.3 | 68.8 | 2  |
| 3  | 0.9 | 1.3  | █    | 86.7 | 86.9 | 94.0 | 91.9 | 90.1 | 91.9 | 88.5 | 93.7 | 90.1 | 78.6 | 83.1 | 88.7 | 95.8 | 79.4 | 82.9 | 88.3 | 94.0 | 85.1 | 84.7 | 95.8  | 84.7 | 90.5 | 72.2 | 75.8 | 81.2 | 3  |
| 4  | 1.3 | 1.7  | 1.3  | █    | 78.4 | 92.7 | 80.2 | 96.2 | 80.2 | 97.8 | 81.9 | 78.4 | 86.7 | 93.3 | 97.4 | 90.9 | 89.1 | 92.7 | 90.9 | 85.5 | 76.6 | 83.7 | 90.9  | 94.4 | 96.2 | 81.9 | 85.5 | 69.4 | 4  |
| 5  | 0.9 | 1.3  | 0.8  | 0.3  | █    | 85.7 | 87.5 | 78.6 | 94.6 | 80.2 | 89.3 | 89.3 | 65.5 | 72.0 | 79.8 | 87.5 | 67.9 | 71.4 | 76.8 | 92.9 | 98.2 | 73.2 | 87.5  | 73.2 | 82.1 | 60.7 | 64.3 | 91.1 | 5  |
| 6  | 0.9 | 1.3  | 0.9  | 0.3  | 0.0  | █    | 87.5 | 92.9 | 87.5 | 94.4 | 89.3 | 85.7 | 79.8 | 86.3 | 94.0 | 98.2 | 82.1 | 85.7 | 91.1 | 92.9 | 83.9 | 87.5 | 98.2  | 87.5 | 96.4 | 75.0 | 78.6 | 76.8 | 6  |
| 7  | 0.9 | 1.3  | 1.3  | 0.3  | 0.0  | 0.0  | █    | 83.9 | 92.9 | 81.9 | 98.2 | 98.2 | 77.4 | 77.0 | 81.5 | 89.3 | 73.2 | 76.8 | 89.3 | 94.6 | 85.7 | 85.5 | 89.3  | 78.6 | 83.9 | 73.0 | 76.8 | 85.7 | 7  |
| 8  | 1.0 | 1.3  | 1.5  | 0.3  | 0.0  | 0.0  | 0.0  | █    | 83.9 | 98.0 | 85.7 | 82.1 | 86.5 | 93.1 | 97.6 | 91.1 | 89.3 | 92.9 | 94.6 | 85.7 | 76.8 | 87.5 | 91.1  | 94.6 | 96.4 | 82.1 | 85.7 | 73.2 | 8  |
| 9  | 0.9 | 1.3  | 1.3  | 0.3  | 0.0  | 0.0  | 0.0  | 0.0  | █    | 81.9 | 94.6 | 94.6 | 70.4 | 77.0 | 81.5 | 89.3 | 73.2 | 76.8 | 82.1 | 94.6 | 92.9 | 78.6 | 89.3  | 78.6 | 83.9 | 66.1 | 69.6 | 89.3 | 9  |
| 10 | 1.3 | 1.0  | 1.2  | 0.6  | 0.3  | 0.3  | 0.3  | 0.3  | 0.3  | █    | 83.7 | 80.2 | 84.9 | 91.5 | 99.2 | 92.7 | 87.3 | 90.9 | 92.7 | 87.3 | 78.4 | 85.5 | 92.7  | 92.7 | 98.0 | 80.2 | 83.7 | 71.2 | 10 |
| 11 | 0.9 | 1.3  | 1.3  | 0.3  | 0.0  | 0.0  | 0.0  | 0.0  | 0.0  | 0.3  | █    | 96.4 | 75.8 | 78.8 | 83.3 | 91.1 | 75.0 | 78.6 | 87.5 | 96.4 | 87.5 | 83.9 | 91.1  | 80.4 | 85.7 | 71.4 | 75.0 | 87.5 | 11 |
| 12 | 0.9 | 1.3  | 1.3  | 0.3  | 0.0  | 0.0  | 0.0  | 0.0  | 0.0  | 0.3  | 0.0  | █    | 75.6 | 75.2 | 79.8 | 87.5 | 71.4 | 75.0 | 87.5 | 92.9 | 87.5 | 83.7 | 87.5  | 76.8 | 82.1 | 71.2 | 75.0 | 87.5 | 12 |
| 13 | 1.0 | 1.4  | 0.0  | 1.3  | 1.0  | 1.0  | 1.8  | 1.6  | 1.6  | 1.3  | 1.6  | 1.8  | █    | 86.7 | 85.1 | 78.0 | 82.9 | 86.5 | 88.1 | 72.6 | 63.7 | 91.9 | 78.0  | 88.3 | 83.3 | 86.5 | 86.3 | 63.3 | 13 |
| 14 | 3.2 | 3.6  | 4.4  | 2.4  | 2.1  | 2.1  | 2.7  | 2.7  | 2.7  | 2.4  | 2.7  | 2.7  | 4.4  | █    | 91.1 | 84.5 | 93.7 | 96.8 | 87.7 | 79.2 | 70.2 | 80.6 | 84.5  | 98.4 | 89.9 | 86.7 | 90.1 | 66.3 | 14 |
| 15 | 1.0 | 1.3  | 0.6  | 1.0  | 0.6  | 0.6  | 0.6  | 0.6  | 0.6  | 0.9  | 0.6  | 0.6  | 0.7  | 2.8  | █    | 92.3 | 86.9 | 90.5 | 92.3 | 86.9 | 78.0 | 85.1 | 92.3  | 92.3 | 97.6 | 79.8 | 83.3 | 70.8 | 15 |
| 16 | 0.9 | 1.3  | 0.8  | 0.3  | 0.0  | 0.0  | 0.0  | 0.0  | 0.0  | 0.3  | 0.0  | 0.0  | 1.0  | 2.1  | 0.6  | █    | 80.4 | 83.9 | 89.3 | 94.6 | 85.7 | 85.7 | 100.0 | 85.7 | 94.6 | 73.2 | 76.8 | 78.6 | 16 |
| 17 | 1.2 | 1.6  | 1.8  | 0.4  | 0.0  | 0.0  | 0.0  | 0.0  | 0.0  | 0.4  | 0.0  | 0.0  | 1.8  | 1.8  | 0.7  | 0.0  | █    | 96.4 | 83.9 | 75.0 | 66.1 | 76.8 | 80.4  | 94.6 | 85.7 | 92.9 | 96.4 | 62.5 | 17 |
| 18 | 1.1 | 1.5  | 1.7  | 0.3  | 0.0  | 0.0  | 0.0  | 0.0  | 0.0  | 0.3  | 0.0  | 0.0  | 1.7  | 2.4  | 0.7  | 0.0  | 0.0  | █    | 87.5 | 78.6 | 69.6 | 80.4 | 83.9  | 98.2 | 89.3 | 89.3 | 92.9 | 66.1 | 18 |
| 19 | 0.9 | 1.3  | 1.5  | 0.3  | 0.0  | 0.0  | 0.0  | 0.0  | 0.0  | 0.3  | 0.0  | 0.0  | 1.8  | 2.7  | 0.6  | 0.0  | 0.0  | 0.0  | █    | 83.9 | 75.0 | 92.7 | 89.3  | 89.3 | 94.6 | 83.7 | 87.5 | 75.0 | 19 |
| 20 | 0.9 | 1.3  | 0.8  | 0.3  | 0.0  | 0.0  | 0.0  | 0.0  | 0.0  | 0.3  | 0.0  | 0.0  | 1.0  | 2.1  | 0.6  | 0.0  | 0.0  | 0.0  | 0.0  | █    | 91.1 | 80.4 | 94.6  | 80.4 | 89.3 | 67.9 | 71.4 | 83.9 | 20 |
| 21 | 0.9 | 1.3  | 0.8  | 0.3  | 0.0  | 0.0  | 0.0  | 0.0  | 0.0  | 0.3  | 0.0  | 0.0  | 1.0  | 2.1  | 0.6  | 0.0  | 0.0  | 0.0  | 0.0  | 0.0  | █    | 71.4 | 85.7  | 71.4 | 80.4 | 58.9 | 62.5 | 92.9 | 21 |
| 22 | 0.9 | 1.3  | 1.4  | 0.3  | 0.0  | 0.0  | 0.3  | 0.0  | 0.0  | 0.3  | 0.0  | 0.3  | 1.4  | 2.7  | 0.6  | 0.0  | 0.0  | 0.0  | 0.3  | 0.0  | 0.0  | █    | 85.7  | 82.1 | 87.5 | 80.4 | 80.2 | 71.4 | 22 |
| 23 | 0.9 | 1.3  | 0.8  | 0.3  | 0.0  | 0.0  | 0.0  | 0.0  | 0.0  | 0.3  | 0.0  | 0.0  | 1.0  | 2.1  | 0.6  | 0.0  | 0.0  | 0.0  | 0.0  | 0.0  | 0.0  | 0.0  | █     | 85.7 | 94.6 | 73.2 | 76.8 | 78.6 | 23 |
| 24 | 1.1 | 1.4  | 1.7  | 0.3  | 0.0  | 0.0  | 0.0  | 0.0  | 0.0  | 0.3  | 0.0  | 0.0  | 1.7  | 2.7  | 0.7  | 0.0  | 0.0  | 0.0  | 0.0  | 0.0  | 0.0  | 0.0  | 0.0   | █    | 91.1 | 87.5 | 91.1 | 67.9 | 24 |
| 25 | 0.9 | 1.3  | 0.9  | 0.3  | 0.0  | 0.0  | 0.0  | 0.0  | 0.0  | 0.3  | 0.0  | 0.0  | 1.0  | 2.1  | 0.6  | 0.0  | 0.0  | 0.0  | 0.0  | 0.0  | 0.0  | 0.0  | 0.0   | 0.0  | █    | 78.6 | 82.1 | 73.2 | 25 |
| 26 | 1.2 | 1.6  | 1.9  | 0.4  | 0.0  | 0.0  | 0.3  | 0.0  | 0.0  | 0.4  | 0.0  | 0.3  | 1.7  | 1.5  | 0.8  | 0.0  | 0.0  | 0.0  | 0.3  | 0.0  | 0.0  | 0.0  | 0.0   | 0.0  | 0.0  | █    | 96.2 | 58.9 | 26 |
| 27 | 1.2 | 1.6  | 1.8  | 0.4  | 0.0  | 0.0  | 0.0  | 0.0  | 0.0  | 0.4  | 0.0  | 0.0  | 2.1  | 1.8  | 0.7  | 0.0  | 0.0  | 0.0  | 0.0  | 0.0  | 0.0  | 0.3  | 0.0   | 0.0  | 0.0  | 0.0  | █    | 62.5 | 27 |
| 28 | 0.9 | 1.3  | 1.3  | 0.3  | 0.0  | 0.0  | 0.0  | 0.0  | 0.0  | 0.3  | 0.0  | 0.0  | 1.6  | 2.7  | 0.6  | 0.0  | 0.0  | 0.0  | 0.0  | 0.0  | 0.0  | 0.0  | 0.0   | 0.0  | 0.0  | 0.0  | 0.0  | █    | 28 |
|    | 1   | 2    | 3    | 4    | 5    | 6    | 7    | 8    | 9    | 10   | 11   | 12   | 13   | 14   | 15   | 16   | 17   | 18   | 19   | 20   | 21   | 22   | 23    | 24   | 25   | 26   | 27   | 28   |    |

B2GYG4\_BURPS\_Bucl10\_Bps 1655.seq  
 COY5B0\_BURPS\_Bucl10\_Bps Pakistan 9.seq  
 Q3JSM5\_BURP1\_Bucl10\_Bps 1710b.seq  
 Bucl10\_Bps NCTC 13179.seq  
 Bucl10\_Bps K96243.seq  
 Bucl10\_Bps 1026b.seq  
 A1V459\_BURMS\_Bucl10\_Bm SAVP1.seq  
 A2S325\_BURM9\_Bucl10\_Bm NCTC 10229.seq  
 A3MJE6\_BURM7\_Bucl10\_Bm NCTC 10247.seq  
 A3NUX3\_BURP0\_Bucl10\_Bps 1106a.seq  
 A5TLC5\_BURMA\_Bucl10\_Bm 2002721280.seq  
 A9K814\_BURMA\_Bucl10\_Bm ATCC 10399.seq  
 B7CPT6\_BURPS\_Bucl10a\_Bps 576.seq  
 Bucl10\_Bps 668.seq  
 Bucl10\_Bps BPC006\_2.seq  
 A8EDY0\_BURPS\_Bucl10\_Bps 406e.seq  
 Bucl10\_Bm A188.seq  
 Bucl10\_Bm A193.seq  
 Bucl10\_Bm PRL-20.seq  
 Bucl10\_Bps MSHR146.seq  
 Bucl10\_Bps MSHR511.seq  
 Bucl10\_Bps MSHR520.seq  
 Bucl10\_Bps NAU20B-16.seq  
 Bucl10\_Bps NCTC 13178.seq  
 C4KXC1\_BURPS\_Bucl10\_MSHR 346.seq  
 A4LQ22\_BURPS\_Bucl10\_Bps 305.seq  
 Bucl10\_Bm strain\_6.seq  
 Bucl10\_Bm strain\_11.seq

*bucl10*

Percent Identity

|    | 1   | 2    | 3    | 4    | 5    | 6    | 7    | 8    | 9    | 10   | 11   | 12   | 13   | 14   | 15   | 16   | 17   | 18   | 19   | 20   | 21   | 22   | 23   | 24   | 25   | 26   | 27   | 28   | 29   | 30   | 31   |                                  |                           |
|----|-----|------|------|------|------|------|------|------|------|------|------|------|------|------|------|------|------|------|------|------|------|------|------|------|------|------|------|------|------|------|------|----------------------------------|---------------------------|
| 1  | █   | 92.4 | 90.3 | 89.6 | 90.1 | 90.1 | 89.6 | 90.1 | 86.6 | 87.3 | 91.2 | 87.3 | 88.7 | 96.5 | 93.5 | 90.1 | 94.9 | 90.8 | 92.9 | 90.1 | 92.2 | 92.2 | 94.0 | 93.5 | 93.1 | 90.1 | 90.1 | 91.5 | 90.1 | 90.1 | 92.2 | 1                                | Buc1f3_Bps K96243.seq     |
| 2  | 2.9 | █    | 94.5 | 95.6 | 94.9 | 94.9 | 92.9 | 87.3 | 90.8 | 91.9 | 96.8 | 91.9 | 94.7 | 93.1 | 93.3 | 95.9 | 94.2 | 95.9 | 94.9 | 95.9 | 96.8 | 95.4 | 94.7 | 95.6 | 96.3 | 95.9 | 95.9 | 95.6 | 95.9 | 95.9 | 96.8 | 2                                | Buc1f3_Bps MSHR 305.seq   |
| 3  | 6.1 | 5.3  | █    | 92.6 | 92.9 | 93.3 | 91.9 | 86.4 | 89.9 | 89.4 | 94.0 | 89.4 | 93.8 | 91.5 | 92.4 | 94.2 | 93.3 | 95.4 | 93.1 | 94.2 | 94.7 | 94.2 | 94.2 | 94.7 | 95.6 | 94.2 | 94.2 | 95.2 | 94.2 | 94.2 | 94.7 | 3                                | Buc1f3_Bps 1106a.seq      |
| 4  | 4.5 | 3.1  | 5.9  | █    | 94.5 | 94.0 | 94.0 | 88.7 | 93.5 | 94.7 | 95.2 | 94.7 | 95.9 | 90.8 | 92.9 | 96.3 | 93.3 | 96.3 | 92.6 | 96.3 | 96.3 | 93.1 | 93.8 | 94.7 | 95.4 | 96.3 | 96.3 | 95.6 | 96.3 | 96.3 | 96.3 | 4                                | Buc1f3_Bps 1026b.seq      |
| 5  | 3.6 | 1.6  | 4.7  | 3.6  | █    | 99.3 | 94.9 | 89.9 | 92.6 | 93.1 | 95.6 | 93.1 | 94.0 | 90.8 | 90.8 | 92.2 | 91.7 | 93.1 | 92.9 | 92.2 | 93.8 | 93.8 | 92.6 | 93.5 | 94.2 | 92.2 | 92.2 | 92.9 | 92.2 | 93.8 | 5    | Buc1f3_Bps 1710b.seq             |                           |
| 6  | 3.6 | 1.6  | 4.2  | 4.1  | 0.5  | █    | 94.9 | 89.9 | 92.6 | 93.1 | 95.6 | 93.1 | 94.0 | 90.8 | 90.8 | 92.2 | 91.7 | 93.1 | 92.9 | 92.2 | 93.8 | 93.8 | 92.6 | 93.5 | 94.2 | 92.2 | 92.2 | 92.9 | 92.2 | 93.8 | 6    | Buc1f3_Bps BPC006.seq            |                           |
| 7  | 4.9 | 3.1  | 5.0  | 3.4  | 4.6  | 4.6  | █    | 92.4 | 93.1 | 93.8 | 94.0 | 93.8 | 95.2 | 91.2 | 94.2 | 92.4 | 94.2 | 93.1 | 92.4 | 92.4 | 93.1 | 91.5 | 94.7 | 94.5 | 93.8 | 92.4 | 92.4 | 92.4 | 92.4 | 93.1 | 7    | Buc1f3_Bps 668.seq               |                           |
| 8  | 5.3 | 3.1  | 5.0  | 3.1  | 4.1  | 4.1  | 2.0  | █    | 90.3 | 91.0 | 88.0 | 91.0 | 89.6 | 90.3 | 91.2 | 86.9 | 90.3 | 87.3 | 86.4 | 86.9 | 87.3 | 85.9 | 89.4 | 88.5 | 88.2 | 86.9 | 86.9 | 86.6 | 86.9 | 87.3 | 8    | Buc1f3_Bps NCTC 13179.seq        |                           |
| 9  | 4.0 | 4.8  | 5.1  | 3.1  | 4.4  | 4.4  | 3.1  | 3.5  | █    | 98.6 | 93.1 | 98.6 | 94.7 | 87.3 | 89.9 | 92.6 | 89.9 | 93.8 | 88.9 | 92.6 | 92.4 | 89.9 | 90.6 | 91.0 | 91.7 | 92.6 | 92.6 | 93.1 | 92.6 | 92.6 | 92.4 | 9                                | Buc1f3_Bps MSHR146.seq    |
| 10 | 3.9 | 4.2  | 6.4  | 2.6  | 4.6  | 4.6  | 3.0  | 3.5  | 0.5  | █    | 92.4 | 99.8 | 93.5 | 88.0 | 90.6 | 92.2 | 90.6 | 92.6 | 89.9 | 92.2 | 93.1 | 90.3 | 91.0 | 91.9 | 92.6 | 92.2 | 92.2 | 91.9 | 92.2 | 93.1 | 10   | Buc1f3_Bps MSHR511.seq           |                           |
| 11 | 1.8 | 1.0  | 3.4  | 4.4  | 1.5  | 1.5  | 2.6  | 3.1  | 4.4  | 4.4  | █    | 92.4 | 97.2 | 91.5 | 91.7 | 94.9 | 92.6 | 95.6 | 93.1 | 94.9 | 94.7 | 93.5 | 93.3 | 93.8 | 94.5 | 94.9 | 94.9 | 95.4 | 94.9 | 94.9 | 94.7 | 11                               | Buc1f3_Bps MSHR520.seq    |
| 12 | 3.9 | 4.2  | 6.4  | 2.6  | 4.6  | 4.6  | 3.0  | 3.5  | 0.5  | 0.0  | 4.4  | █    | 93.5 | 88.0 | 90.6 | 92.2 | 90.6 | 92.6 | 89.9 | 92.2 | 93.1 | 90.3 | 91.0 | 91.9 | 92.6 | 92.2 | 92.2 | 91.9 | 92.2 | 93.1 | 12   | Buc1f3_Bps NAU20B-16.seq         |                           |
| 13 | 4.8 | 3.4  | 3.7  | 3.6  | 3.4  | 3.4  | 1.3  | 1.3  | 2.6  | 3.1  | 2.8  | 3.1  | █    | 90.3 | 93.3 | 95.6 | 92.9 | 96.8 | 91.9 | 95.6 | 95.4 | 92.9 | 93.5 | 94.0 | 94.7 | 95.6 | 95.6 | 96.1 | 95.6 | 95.4 | 13   | Buc1f3_Bps NCTC 13178.seq        |                           |
| 14 | 2.7 | 2.9  | 5.5  | 3.9  | 3.6  | 3.6  | 3.9  | 4.3  | 4.0  | 3.9  | 2.4  | 3.9  | 3.7  | █    | 94.9 | 91.7 | 96.5 | 92.4 | 95.4 | 91.7 | 93.8 | 94.7 | 95.6 | 95.2 | 94.7 | 91.7 | 93.1 | 91.7 | 91.7 | 93.8 | 14   | A8EP72_BURPS_Buc1f3_Bps 406e.seq |                           |
| 15 | 5.4 | 3.4  | 5.3  | 2.3  | 4.4  | 4.4  | 1.3  | 2.5  | 1.8  | 1.8  | 2.9  | 1.8  | 1.0  | 4.6  | █    | 93.8 | 97.2 | 94.5 | 93.8 | 93.8 | 94.5 | 92.9 | 97.0 | 95.9 | 95.2 | 93.8 | 93.8 | 93.8 | 93.8 | 94.5 | 15   | B2HC24_BURPS_Buc1f3_Bps 1655.seq |                           |
| 16 | 4.0 | 2.9  | 4.0  | 0.8  | 3.2  | 3.2  | 2.1  | 2.1  | 2.6  | 2.4  | 3.2  | 2.4  | 2.4  | 2.9  | 1.3  | █    | 94.2 | 98.6 | 93.5 | 99.8 | 97.0 | 94.0 | 94.9 | 95.6 | 96.3 | 99.8 | 99.8 | 97.9 | 99.8 | 97.0 | 16   | Buc1f3_Bm 2000031281.seq         |                           |
| 17 | 3.0 | 3.1  | 5.0  | 2.6  | 4.2  | 4.2  | 2.0  | 2.8  | 2.6  | 2.6  | 2.6  | 2.6  | 2.4  | 2.0  | 2.0  | 1.6  | █    | 94.9 | 95.6 | 94.2 | 96.3 | 94.7 | 98.6 | 97.7 | 97.0 | 94.2 | 94.2 | 95.6 | 94.2 | 96.3 | 17   | Buc1f3_Bm 2002721280.seq         |                           |
| 18 | 4.0 | 3.7  | 3.4  | 1.6  | 2.9  | 2.9  | 2.1  | 2.4  | 2.1  | 2.6  | 3.2  | 2.6  | 1.8  | 2.9  | 1.3  | 0.5  | 1.6  | █    | 94.0 | 98.6 | 97.9 | 94.9 | 95.6 | 96.1 | 96.8 | 98.6 | 98.6 | 99.1 | 98.6 | 97.9 | 18   | Buc1f3_Bm A188.seq               |                           |
| 19 | 3.9 | 3.9  | 6.9  | 5.0  | 4.4  | 4.4  | 5.2  | 5.8  | 5.3  | 5.0  | 3.7  | 5.0  | 5.1  | 1.8  | 4.4  | 4.0  | 3.1  | 4.2  | █    | 93.5 | 95.6 | 98.6 | 96.5 | 97.7 | 96.8 | 93.5 | 93.5 | 94.7 | 93.5 | 95.6 | 19   | Buc1f3_Bm A193.seq               |                           |
| 20 | 4.0 | 2.9  | 4.0  | 0.8  | 3.2  | 3.2  | 2.1  | 2.1  | 2.6  | 2.4  | 3.2  | 2.4  | 2.4  | 2.9  | 1.3  | 0.0  | 1.6  | 0.5  | 4.0  | █    | 97.0 | 94.0 | 94.9 | 95.6 | 96.3 | 99.8 | 99.8 | 97.9 | 99.8 | 97.0 | 20   | Buc1f3_Bm China 7.seq            |                           |
| 21 | 3.1 | 3.4  | 5.0  | 2.3  | 2.9  | 2.9  | 2.9  | 3.1  | 2.9  | 2.9  | 3.4  | 2.9  | 2.6  | 2.1  | 2.1  | 1.6  | 0.8  | 1.3  | 3.1  | 1.6  | █    | 96.5 | 96.8 | 97.7 | 98.4 | 97.0 | 97.0 | 98.6 | 97.0 | 99.8 | 21   | Buc1f3_Bm PRL-20.seq             |                           |
| 22 | 3.9 | 4.2  | 6.4  | 5.3  | 3.6  | 3.6  | 5.5  | 5.5  | 5.1  | 5.3  | 4.0  | 5.3  | 4.8  | 1.8  | 4.7  | 4.3  | 3.4  | 4.0  | 0.5  | 4.3  | 2.9  | █    | 95.6 | 96.5 | 97.5 | 94.0 | 94.0 | 95.6 | 94.0 | 96.5 | 22   | Buc1f3_Bm strain_6.seq           |                           |
| 23 | 3.3 | 3.4  | 4.7  | 2.9  | 3.9  | 3.9  | 2.3  | 3.1  | 2.6  | 2.9  | 2.6  | 2.9  | 2.4  | 2.3  | 1.5  | 1.6  | 0.5  | 1.6  | 2.8  | 1.6  | 1.0  | 3.1  | █    | 98.6 | 97.9 | 94.9 | 94.9 | 96.3 | 94.9 | 96.8 | 23   | Buc1f3_Bm strain_11.seq          |                           |
| 24 | 3.1 | 3.1  | 5.0  | 2.6  | 3.6  | 3.6  | 2.8  | 3.4  | 2.9  | 2.6  | 2.9  | 2.6  | 2.6  | 2.0  | 2.0  | 1.6  | 0.8  | 1.8  | 2.3  | 1.6  | 0.8  | 2.8  | 0.5  | █    | 98.8 | 95.6 | 95.6 | 96.8 | 95.6 | 97.7 | 24   | Buc1f3_Bm NCTC 10229.seq         |                           |
| 25 | 2.8 | 3.1  | 4.7  | 2.6  | 3.1  | 3.1  | 2.8  | 2.8  | 2.9  | 2.6  | 2.9  | 2.6  | 2.6  | 1.8  | 2.1  | 1.6  | 0.8  | 1.8  | 2.6  | 1.6  | 0.8  | 2.6  | 0.5  | 0.3  | █    | 96.3 | 96.3 | 97.5 | 96.3 | 98.4 | 25   | Buc1f3_Bm NCTC 10247.seq         |                           |
| 26 | 4.0 | 2.9  | 4.0  | 0.8  | 3.2  | 3.2  | 2.1  | 2.1  | 2.6  | 2.4  | 3.2  | 2.4  | 2.4  | 2.9  | 1.3  | 0.0  | 1.6  | 0.5  | 4.0  | 0.0  | 1.6  | 4.3  | 1.6  | 1.6  | 1.6  | █    | 99.8 | 97.9 | 99.8 | 97.0 | 26   | Buc1f3_Bm FMH.seq                |                           |
| 27 | 4.0 | 2.9  | 4.0  | 0.8  | 3.2  | 3.2  | 2.1  | 2.1  | 2.6  | 2.4  | 3.2  | 2.4  | 2.4  | 2.9  | 1.3  | 0.0  | 1.6  | 0.5  | 4.0  | 0.0  | 1.6  | 4.3  | 1.6  | 1.6  | 1.6  | 0.0  | █    | 97.9 | 99.8 | 97.0 | 27   | Buc1f3_Bm JHU.seq                |                           |
| 28 | 3.2 | 4.0  | 3.7  | 2.4  | 3.2  | 3.2  | 2.9  | 3.2  | 2.9  | 3.4  | 3.4  | 3.4  | 2.6  | 2.1  | 2.1  | 1.3  | 0.8  | 0.8  | 3.4  | 1.3  | 0.5  | 3.2  | 0.8  | 1.0  | 1.0  | 1.3  | 1.3  | █    | 97.9 | 97.9 | 98.6 | 28                               | Buc1f3_Bm ATCC 10399.seq  |
| 29 | 4.0 | 2.9  | 4.0  | 0.8  | 3.2  | 3.2  | 2.1  | 2.1  | 2.6  | 2.4  | 3.2  | 2.4  | 2.4  | 2.9  | 1.3  | 0.0  | 1.6  | 0.5  | 4.0  | 0.0  | 1.6  | 4.3  | 1.6  | 1.6  | 1.6  | 0.0  | 0.0  | 1.3  | █    | 99.8 | 97.0 | 29                               | Buc1f3_Bm GB8 horse 4.seq |
| 30 | 4.0 | 2.9  | 4.0  | 0.8  | 3.2  | 3.2  | 2.1  | 2.1  | 2.6  | 2.4  | 3.2  | 2.4  | 2.4  | 2.9  | 1.3  | 0.0  | 1.6  | 0.5  | 4.0  | 0.0  | 1.6  | 4.3  | 1.6  | 1.6  | 1.6  | 0.0  | 0.0  | 1.3  | 0.0  | █    | 97.0 | 30                               | Buc1f3_Bm ATCC 23344.seq  |
| 31 | 3.1 | 3.4  | 5.0  | 2.3  | 2.9  | 2.9  | 2.9  | 3.1  | 2.9  | 2.9  | 3.4  | 2.9  | 2.6  | 2.1  | 2.1  | 1.6  | 0.8  | 1.3  | 3.1  | 1.6  | 0.0  | 2.9  | 1.0  | 0.8  | 0.8  | 1.6  | 1.6  | 0.5  | 1.6  | 1.6  | █    | 31                               | Buc1f3_Bm SAVP1.seq       |

*buc13*

## Percent Identity

|    | 1   | 2    | 3    | 4    | 5    | 6    | 7    | 8    | 9    | 10    | 11    | 12   | 13    | 14    | 15    | 16    | 17    | 18    | 19   | 20    | 21   | 22    | 23   | 24    | 25    | 26    | 27   | 28   | 29    | 30   |                         |                                 |                      |                          |
|----|-----|------|------|------|------|------|------|------|------|-------|-------|------|-------|-------|-------|-------|-------|-------|------|-------|------|-------|------|-------|-------|-------|------|------|-------|------|-------------------------|---------------------------------|----------------------|--------------------------|
| 1  | ■   | 43.4 | 50.2 | 48.8 | 42.0 | 43.4 | 46.2 | 49.3 | 49.1 | 46.2  | 46.2  | 47.7 | 47.7  | 47.7  | 46.2  | 46.2  | 46.2  | 46.2  | 46.2 | 46.2  | 50.5 | 49.1  | 51.6 | 51.6  | 42.0  | 51.6  | 43.9 | 43.6 | 43.4  | 42.4 | 1                       | A3N630_BURP6_Bucl14_Bps 668.seq |                      |                          |
| 2  | 4.0 | ■    | 92.0 | 93.6 | 97.6 | 99.7 | 96.0 | 92.5 | 92.7 | 96.0  | 96.0  | 94.3 | 94.3  | 94.3  | 96.0  | 96.0  | 96.0  | 96.0  | 95.8 | 96.0  | 91.1 | 92.7  | 90.5 | 90.5  | 97.6  | 90.5  | 99.1 | 99.5 | 99.7  | 97.2 | 2                       | Bucl14_Bps 1026b.seq            |                      |                          |
| 3  | 2.4 | 4.0  | ■    | 97.4 | 90.6 | 92.0 | 94.6 | 98.8 | 98.6 | 94.6  | 94.6  | 96.4 | 96.4  | 96.4  | 94.6  | 94.6  | 94.6  | 94.6  | 94.6 | 94.6  | 96.4 | 98.6  | 97.0 | 97.0  | 90.6  | 97.0  | 92.5 | 92.2 | 92.0  | 91.0 | 3                       | Bucl14_Bps 1106a.seq            |                      |                          |
| 4  | 2.1 | 4.0  | 2.1  | ■    | 92.2 | 93.6 | 96.5 | 96.9 | 96.7 | 96.5  | 96.5  | 99.0 | 99.0  | 99.0  | 96.5  | 96.5  | 96.5  | 96.5  | 96.5 | 96.5  | 95.1 | 96.7  | 95.5 | 95.5  | 92.2  | 95.5  | 94.1 | 93.8 | 93.6  | 92.5 | 4                       | Bucl14_Bps BPC006.seq           |                      |                          |
| 5  | 3.7 | 2.0  | 3.7  | 3.7  | ■    | 97.6 | 94.3 | 91.0 | 91.0 | 94.3  | 94.3  | 92.5 | 92.5  | 92.5  | 94.3  | 94.3  | 94.3  | 94.3  | 94.1 | 94.3  | 89.4 | 91.0  | 89.1 | 89.1  | 100.0 | 89.1  | 96.9 | 97.0 | 97.6  | 99.3 | 5                       | Bucl14_Bps MSHR 305.seq         |                      |                          |
| 6  | 4.0 | 0.8  | 4.0  | 4.0  | 2.0  | ■    | 96.0 | 92.5 | 92.7 | 96.0  | 96.0  | 94.3 | 94.3  | 94.3  | 96.0  | 96.0  | 96.0  | 96.0  | 95.8 | 96.0  | 91.1 | 92.7  | 90.5 | 90.5  | 97.6  | 90.5  | 99.1 | 99.5 | 100.0 | 97.2 | 6                       | Bucl14_Bps NCTC 13179.seq       |                      |                          |
| 7  | 4.5 | 2.0  | 4.9  | 4.1  | 2.4  | 2.0  | ■    | 95.8 | 96.0 | 100.0 | 100.0 | 97.6 | 97.6  | 97.6  | 100.0 | 100.0 | 100.0 | 100.0 | 99.8 | 100.0 | 94.4 | 96.0  | 93.1 | 93.1  | 94.3  | 93.1  | 95.8 | 95.8 | 96.0  | 94.3 | 7                       | Bucl14_Bm ATCC 23344.seq        |                      |                          |
| 8  | 4.2 | 2.8  | 2.4  | 3.2  | 2.9  | 2.8  | 2.2  | ■    | 99.8 | 95.8  | 95.8  | 97.6 | 97.6  | 97.6  | 95.8  | 95.8  | 95.8  | 95.8  | 95.7 | 95.8  | 97.6 | 99.8  | 95.8 | 95.8  | 91.0  | 95.8  | 92.4 | 92.4 | 92.5  | 91.0 | 8                       | Bucl14_Bm NCTC 10229.seq        |                      |                          |
| 9  | 4.6 | 2.4  | 2.8  | 3.6  | 2.9  | 2.4  | 1.8  | 0.3  | ■    | 96.0  | 96.0  | 97.7 | 97.7  | 97.7  | 96.0  | 96.0  | 96.0  | 96.0  | 95.8 | 96.0  | 97.7 | 100.0 | 95.7 | 95.7  | 91.0  | 95.7  | 92.5 | 92.5 | 92.7  | 91.0 | 9                       | Bucl14_Bm NCTC 10247.seq        |                      |                          |
| 10 | 4.5 | 2.0  | 4.9  | 4.1  | 2.4  | 2.0  | 0.0  | 2.2  | 1.8  | ■     | 100.0 | 97.6 | 97.6  | 97.6  | 100.0 | 100.0 | 100.0 | 100.0 | 99.8 | 100.0 | 94.4 | 96.0  | 93.1 | 93.1  | 94.3  | 93.1  | 95.8 | 95.8 | 96.0  | 94.3 | 10                      | Bucl14_Bm SAVP1.seq             |                      |                          |
| 11 | 4.5 | 2.0  | 4.9  | 4.1  | 2.4  | 2.0  | 0.0  | 2.2  | 1.8  | 0.0   | ■     | 97.6 | 97.6  | 97.6  | 100.0 | 100.0 | 100.0 | 100.0 | 99.8 | 100.0 | 94.4 | 96.0  | 93.1 | 93.1  | 94.3  | 93.1  | 95.8 | 95.8 | 96.0  | 94.3 | 11                      | Bucl14_Bm 2000031281.seq        |                      |                          |
| 12 | 4.4 | 2.4  | 4.4  | 2.1  | 2.9  | 2.4  | 1.8  | 1.8  | 1.4  | 1.8   | 1.8   | ■    | 100.0 | 100.0 | 97.6  | 97.6  | 97.6  | 97.6  | 97.6 | 97.6  | 97.4 | 97.6  | 96.2 | 97.7  | 94.4  | 94.4  | 92.5 | 94.4 | 94.1  | 94.1 | 94.3                    | 92.5                            | 12                   | Bucl14_Bm 2002721280.seq |
| 13 | 4.4 | 2.4  | 4.4  | 2.1  | 2.9  | 2.4  | 1.8  | 1.8  | 1.4  | 1.8   | 1.8   | 0.0  | ■     | 100.0 | 97.6  | 97.6  | 97.6  | 97.6  | 97.4 | 97.6  | 96.2 | 97.7  | 94.4 | 94.4  | 92.5  | 94.4  | 94.1 | 94.1 | 94.3  | 92.5 | 13                      | Bucl14_Bm A188.seq              |                      |                          |
| 14 | 4.4 | 2.4  | 4.4  | 2.1  | 2.9  | 2.4  | 1.8  | 1.8  | 1.4  | 1.8   | 1.8   | 0.0  | 0.0   | ■     | 97.6  | 97.6  | 97.6  | 97.6  | 97.4 | 97.6  | 96.2 | 97.7  | 94.4 | 94.4  | 92.5  | 94.4  | 94.1 | 94.1 | 94.3  | 92.5 | 14                      | Bucl14_Bm A193.seq              |                      |                          |
| 15 | 4.5 | 2.0  | 4.9  | 4.1  | 2.4  | 2.0  | 0.0  | 2.2  | 1.8  | 0.0   | 0.0   | 1.8  | 1.8   | 1.8   | ■     | 100.0 | 100.0 | 100.0 | 99.8 | 100.0 | 94.4 | 96.0  | 93.1 | 93.1  | 94.3  | 93.1  | 95.8 | 95.8 | 96.0  | 94.3 | 15                      | Bucl14_Bm ATCC 10399.seq        |                      |                          |
| 16 | 4.5 | 2.0  | 4.9  | 4.1  | 2.4  | 2.0  | 0.0  | 2.2  | 1.8  | 0.0   | 0.0   | 1.8  | 1.8   | 1.8   | 0.0   | ■     | 100.0 | 100.0 | 99.8 | 100.0 | 94.4 | 96.0  | 93.1 | 93.1  | 94.3  | 93.1  | 95.8 | 95.8 | 96.0  | 94.3 | 16                      | Bucl14_Bm China 7.seq           |                      |                          |
| 17 | 4.5 | 2.0  | 4.9  | 4.1  | 2.4  | 2.0  | 0.0  | 2.2  | 1.8  | 0.0   | 0.0   | 1.8  | 1.8   | 1.8   | 0.0   | 0.0   | ■     | 100.0 | 99.8 | 100.0 | 94.4 | 96.0  | 93.1 | 93.1  | 94.3  | 93.1  | 95.8 | 95.8 | 96.0  | 94.3 | 17                      | Bucl14_Bm FMH.seq               |                      |                          |
| 18 | 4.5 | 2.0  | 4.9  | 4.1  | 2.4  | 2.0  | 0.0  | 2.2  | 1.8  | 0.0   | 0.0   | 1.8  | 1.8   | 1.8   | 0.0   | 0.0   | 0.0   | ■     | 99.8 | 100.0 | 94.4 | 96.0  | 93.1 | 93.1  | 94.3  | 93.1  | 95.8 | 95.8 | 96.0  | 94.3 | 18                      | Bucl14_Bm GB8 horse 4.seq       |                      |                          |
| 19 | 4.1 | 2.0  | 4.5  | 3.7  | 2.5  | 2.0  | 0.0  | 2.2  | 1.8  | 0.0   | 0.0   | 1.8  | 1.8   | 1.8   | 0.0   | 0.0   | 0.0   | 0.0   | ■    | 99.8  | 94.3 | 95.8  | 93.1 | 93.1  | 94.1  | 93.1  | 95.8 | 95.7 | 95.8  | 94.1 | 19                      | Bucl14_Bm JHU.seq               |                      |                          |
| 20 | 4.5 | 2.0  | 4.9  | 4.1  | 2.4  | 2.0  | 0.0  | 2.2  | 1.8  | 0.0   | 0.0   | 1.8  | 1.8   | 1.8   | 0.0   | 0.0   | 0.0   | 0.0   | 0.0  | ■     | 94.4 | 96.0  | 93.1 | 93.1  | 94.3  | 93.1  | 95.8 | 95.8 | 96.0  | 94.3 | 20                      | Bucl14_Bm PRL-20.seq            |                      |                          |
| 21 | 4.8 | 2.4  | 4.2  | 3.6  | 2.9  | 2.4  | 1.8  | 1.7  | 1.4  | 1.8   | 1.8   | 1.4  | 1.4   | 1.4   | 1.8   | 1.8   | 1.8   | 1.8   | 1.8  | 1.8   | ■    | 97.7  | 97.9 | 97.9  | 89.4  | 97.9  | 91.0 | 91.0 | 91.1  | 89.4 | 21                      | Bucl14_Bm strain_6.seq          |                      |                          |
| 22 | 4.6 | 2.4  | 2.8  | 3.6  | 2.9  | 2.4  | 1.8  | 0.3  | 0.0  | 1.8   | 1.8   | 1.4  | 1.4   | 1.4   | 1.8   | 1.8   | 1.8   | 1.8   | 1.8  | 1.8   | 1.4  | ■     | 95.7 | 95.7  | 91.0  | 95.7  | 92.5 | 92.5 | 92.7  | 91.0 | 22                      | Bucl14_Bm strain_11.seq         |                      |                          |
| 23 | 2.7 | 4.0  | 2.8  | 2.9  | 3.7  | 4.0  | 4.9  | 5.3  | 5.7  | 4.9   | 4.9   | 5.1  | 5.1   | 5.1   | 4.9   | 4.9   | 4.9   | 4.9   | 4.5  | 4.9   | 4.1  | 5.7   | ■    | 100.0 | 89.1  | 100.0 | 91.0 | 90.6 | 90.5  | 89.4 | 23                      | Bucl14_Bps MSHR146.seq          |                      |                          |
| 24 | 2.7 | 4.0  | 2.8  | 2.9  | 3.7  | 4.0  | 4.9  | 5.3  | 5.7  | 4.9   | 4.9   | 5.1  | 5.1   | 5.1   | 4.9   | 4.9   | 4.9   | 4.9   | 4.5  | 4.9   | 4.1  | 5.7   | 0.0  | ■     | 89.1  | 100.0 | 91.0 | 90.6 | 90.5  | 89.4 | 24                      | Bucl14_Bps MSHR511.seq          |                      |                          |
| 25 | 3.7 | 2.0  | 3.7  | 3.7  | 0.0  | 2.0  | 2.4  | 2.9  | 2.9  | 2.4   | 2.4   | 2.9  | 2.9   | 2.9   | 2.4   | 2.4   | 2.4   | 2.4   | 2.5  | 2.4   | 2.9  | 2.9   | 3.7  | 3.7   | ■     | 89.1  | 96.9 | 97.0 | 97.6  | 99.3 | 25                      | Bucl14_Bps MSHR520.seq          |                      |                          |
| 26 | 2.7 | 4.0  | 2.8  | 2.9  | 3.7  | 4.0  | 4.9  | 5.3  | 5.7  | 4.9   | 4.9   | 5.1  | 5.1   | 5.1   | 4.9   | 4.9   | 4.9   | 4.9   | 4.5  | 4.9   | 4.1  | 5.7   | 0.0  | 0.0   | 3.7   | ■     | 91.0 | 90.6 | 90.5  | 89.4 | 26                      | Bucl14_Bps NAU20B-16.seq        |                      |                          |
| 27 | 2.8 | 2.0  | 2.8  | 2.8  | 3.7  | 2.0  | 2.4  | 3.2  | 2.8  | 2.4   | 2.4   | 2.8  | 2.8   | 2.8   | 2.4   | 2.4   | 2.4   | 2.4   | 2.0  | 2.4   | 2.8  | 2.8   | 2.8  | 2.8   | 3.7   | 2.8   | ■    | 99.3 | 99.1  | 97.2 | 27                      | Bucl14_Bps NCTC 13178.seq       |                      |                          |
| 28 | 3.6 | 1.2  | 3.6  | 3.6  | 3.3  | 1.2  | 2.4  | 3.2  | 2.8  | 2.4   | 2.4   | 2.8  | 2.8   | 2.8   | 2.4   | 2.4   | 2.4   | 2.4   | 2.4  | 2.4   | 2.4  | 2.8   | 2.8  | 3.6   | 3.6   | 3.3   | 3.6  | 1.6  | ■     | 99.5 | 97.4                    | 28                              | Bucl14_Bps 1710b.seq |                          |
| 29 | 4.0 | 0.8  | 4.0  | 4.0  | 2.0  | 0.0  | 2.0  | 2.8  | 2.4  | 2.0   | 2.0   | 2.4  | 2.4   | 2.4   | 2.0   | 2.0   | 2.0   | 2.0   | 2.0  | 2.0   | 2.4  | 2.4   | 4.0  | 4.0   | 2.0   | 4.0   | 2.0  | 1.2  | ■     | 97.2 | 29                      | Bucl14_Bps K96243.seq           |                      |                          |
| 30 | 2.9 | 2.9  | 2.9  | 2.9  | 1.6  | 2.9  | 2.4  | 2.9  | 2.9  | 2.4   | 2.4   | 2.9  | 2.9   | 2.9   | 2.4   | 2.4   | 2.4   | 2.4   | 2.5  | 2.4   | 2.9  | 2.9   | 2.9  | 1.6   | 2.9   | 2.9   | 2.4  | 2.9  | ■     | 30   | Bucl14_Bps MSHR 346.seq |                                 |                      |                          |
|    | 1   | 2    | 3    | 4    | 5    | 6    | 7    | 8    | 9    | 10    | 11    | 12   | 13    | 14    | 15    | 16    | 17    | 18    | 19   | 20    | 21   | 22    | 23   | 24    | 25    | 26    | 27   | 28   | 29    | 30   |                         |                                 |                      |                          |

*bucl14*

## Percent Identity

|    | 1   | 2    | 3    | 4     | 5    | 6     | 7    | 8    | 9    | 10    | 11   | 12   | 13   | 14   | 15    | 16    | 17    | 18   | 19   | 20    | 21    | 22    | 23    | 24    | 25    | 26    | 27    | 28    |    |                                 |
|----|-----|------|------|-------|------|-------|------|------|------|-------|------|------|------|------|-------|-------|-------|------|------|-------|-------|-------|-------|-------|-------|-------|-------|-------|----|---------------------------------|
| 1  | █   | 95.5 | 89.9 | 100.0 | 95.0 | 89.9  | 71.7 | 77.3 | 70.6 | 95.5  | 72.8 | 74.5 | 94.1 | 91.6 | 94.1  | 91.6  | 91.6  | 91.6 | 91.6 | 91.6  | 91.6  | 91.6  | 94.1  | 94.1  | 91.3  | 94.1  | 94.1  | 91.3  | 1  | Bucl15_Bps_K96243.seq           |
| 2  | 3.9 | █    | 93.6 | 95.5  | 98.0 | 93.6  | 73.7 | 75.6 | 68.9 | 100.0 | 71.1 | 72.3 | 89.9 | 87.4 | 89.9  | 87.4  | 89.9  | 87.7 | 87.7 | 87.4  | 87.4  | 87.4  | 89.9  | 89.9  | 87.7  | 89.9  | 89.9  | 87.7  | 2  | Bucl15_Bps_MSHR_305.seq         |
| 3  | 6.2 | 3.6  | █    | 89.9  | 93.3 | 100.0 | 75.1 | 76.2 | 69.5 | 93.6  | 71.7 | 67.2 | 85.2 | 82.6 | 85.2  | 82.6  | 85.2  | 82.6 | 82.9 | 82.6  | 82.6  | 82.6  | 85.2  | 85.2  | 82.6  | 85.2  | 85.2  | 82.6  | 3  | Bucl15_Bps_1106a.seq            |
| 4  | 0.0 | 3.9  | 6.2  | █     | 95.0 | 89.9  | 71.7 | 77.3 | 70.6 | 95.5  | 72.8 | 74.5 | 94.1 | 91.6 | 94.1  | 91.6  | 94.1  | 91.3 | 91.6 | 91.6  | 91.6  | 91.6  | 94.1  | 94.1  | 91.3  | 94.1  | 94.1  | 91.3  | 4  | Bucl15_Bps_1026b.seq            |
| 5  | 5.0 | 3.9  | 4.3  | 5.0   | █    | 93.3  | 73.1 | 75.1 | 68.3 | 98.0  | 70.6 | 73.1 | 89.4 | 86.8 | 89.4  | 86.8  | 89.4  | 86.6 | 86.6 | 86.8  | 86.8  | 86.8  | 89.4  | 89.4  | 86.6  | 89.4  | 89.4  | 86.6  | 5  | Bucl15_Bps_1710b.seq            |
| 6  | 6.2 | 3.6  | 0.0  | 6.2   | 4.3  | █     | 75.1 | 76.2 | 69.5 | 93.6  | 71.7 | 67.2 | 85.2 | 82.6 | 85.2  | 82.6  | 85.2  | 82.6 | 82.9 | 82.6  | 82.6  | 82.6  | 85.2  | 85.2  | 82.6  | 85.2  | 85.2  | 82.6  | 6  | Bucl15_Bps_BPC006.seq           |
| 7  | 7.7 | 7.7  | 4.3  | 7.7   | 9.0  | 4.3   | █    | 51.8 | 45.1 | 73.7  | 47.3 | 48.7 | 71.7 | 73.9 | 71.7  | 73.9  | 71.7  | 74.2 | 69.7 | 73.9  | 73.9  | 73.9  | 71.7  | 71.7  | 74.2  | 71.7  | 71.7  | 74.2  | 7  | A3NDA8_BURP6_Bucl15_Bps_668.seq |
| 8  | 3.9 | 3.5  | 3.0  | 3.9   | 4.7  | 3.0   | 6.2  | █    | 93.3 | 75.6  | 95.5 | 86.8 | 76.5 | 73.9 | 76.5  | 73.9  | 76.5  | 73.9 | 78.4 | 73.9  | 73.9  | 73.9  | 76.5  | 76.5  | 73.9  | 76.5  | 76.5  | 73.9  | 8  | Bucl15_Bps_MSHR146.seq          |
| 9  | 3.9 | 3.5  | 3.0  | 3.9   | 4.7  | 3.0   | 6.2  | 0.0  | █    | 68.9  | 97.8 | 88.8 | 69.7 | 67.2 | 69.7  | 67.2  | 69.7  | 67.2 | 71.7 | 67.2  | 67.2  | 67.2  | 69.7  | 69.7  | 67.2  | 69.7  | 69.7  | 67.2  | 9  | Bucl15_Bps_MSHR511.seq          |
| 10 | 3.9 | 0.0  | 3.6  | 3.9   | 3.9  | 3.6   | 7.7  | 3.5  | 3.5  | █     | 71.1 | 72.3 | 89.9 | 87.4 | 89.9  | 87.4  | 89.9  | 87.7 | 87.7 | 87.4  | 87.4  | 87.4  | 89.9  | 89.9  | 87.7  | 89.9  | 89.9  | 87.7  | 10 | Bucl15_Bps_MSHR520.seq          |
| 11 | 3.9 | 3.5  | 3.0  | 3.9   | 4.7  | 3.0   | 6.2  | 0.0  | 0.0  | 3.5   | █    | 91.0 | 72.0 | 69.5 | 72.0  | 69.5  | 72.0  | 69.5 | 73.9 | 69.5  | 69.5  | 69.5  | 72.0  | 72.0  | 69.5  | 72.0  | 72.0  | 69.5  | 11 | Bucl15_Bps_NAU20B-16.seq        |
| 12 | 5.8 | 5.6  | 6.8  | 5.8   | 3.8  | 6.8   | 8.9  | 8.9  | 8.8  | 5.6   | 8.8  | █    | 72.8 | 70.3 | 72.8  | 70.3  | 72.8  | 70.0 | 74.5 | 70.3  | 70.3  | 70.3  | 72.8  | 72.8  | 70.0  | 72.8  | 72.8  | 70.0  | 12 | Bucl15_Bps_NCTC_13178.seq       |
| 13 | 2.1 | 5.6  | 6.3  | 2.1   | 6.8  | 6.3   | 7.9  | 4.8  | 4.8  | 5.6   | 4.8  | 8.3  | █    | 96.9 | 100.0 | 96.9  | 100.0 | 96.6 | 96.6 | 96.9  | 96.9  | 96.9  | 100.0 | 100.0 | 96.6  | 100.0 | 100.0 | 96.6  | 13 | Bucl15_Bm_2000031281.seq        |
| 14 | 2.1 | 5.6  | 6.3  | 2.1   | 6.8  | 6.3   | 8.1  | 4.8  | 4.8  | 5.6   | 4.8  | 8.3  | 0.9  | █    | 96.9  | 100.0 | 96.9  | 99.7 | 93.6 | 100.0 | 100.0 | 100.0 | 96.9  | 96.9  | 99.7  | 96.9  | 96.9  | 99.7  | 14 | Bucl15_Bm_2002721280.seq        |
| 15 | 2.1 | 5.6  | 6.3  | 2.1   | 6.8  | 6.3   | 7.9  | 4.8  | 4.8  | 5.6   | 4.8  | 8.3  | 0.0  | 0.9  | █     | 96.9  | 100.0 | 96.6 | 96.6 | 96.9  | 96.9  | 96.9  | 100.0 | 100.0 | 96.6  | 100.0 | 100.0 | 96.6  | 15 | Bucl15_Bm_A188.seq              |
| 16 | 2.1 | 5.6  | 6.3  | 2.1   | 6.8  | 6.3   | 8.1  | 4.8  | 4.8  | 5.6   | 4.8  | 8.3  | 0.9  | 0.0  | 0.9   | █     | 96.9  | 99.7 | 93.6 | 100.0 | 100.0 | 100.0 | 96.9  | 96.9  | 99.7  | 96.9  | 96.9  | 99.7  | 16 | Bucl15_Bm_A193.seq              |
| 17 | 2.1 | 5.6  | 6.3  | 2.1   | 6.8  | 6.3   | 7.9  | 4.8  | 4.8  | 5.6   | 4.8  | 8.3  | 0.0  | 0.9  | 0.0   | 0.9   | █     | 96.6 | 96.6 | 96.9  | 96.9  | 96.9  | 100.0 | 100.0 | 96.6  | 100.0 | 100.0 | 96.6  | 17 | Bucl15_Bm_China_7.seq           |
| 18 | 2.6 | 5.0  | 6.3  | 2.6   | 7.4  | 6.3   | 7.5  | 4.8  | 4.8  | 5.0   | 4.8  | 8.9  | 1.4  | 0.5  | 1.4   | 0.5   | 1.4   | █    | 93.8 | 99.7  | 99.7  | 99.7  | 96.6  | 96.6  | 100.0 | 96.6  | 96.6  | 100.0 | 18 | Bucl15_Bm_PRL-20.seq            |
| 19 | 2.6 | 5.6  | 6.3  | 2.6   | 8.0  | 6.3   | 7.3  | 5.2  | 5.2  | 5.6   | 5.2  | 9.0  | 1.9  | 2.9  | 1.9   | 2.9   | 1.9   | 2.4  | █    | 93.6  | 93.6  | 93.6  | 96.6  | 96.6  | 93.8  | 96.6  | 96.6  | 93.8  | 19 | Bucl15_Bm_strain_6.seq          |
| 20 | 2.1 | 5.6  | 6.3  | 2.1   | 6.8  | 6.3   | 8.1  | 4.8  | 4.8  | 5.6   | 4.8  | 8.3  | 0.9  | 0.0  | 0.9   | 0.0   | 0.9   | 0.5  | 2.9  | █     | 100.0 | 100.0 | 96.9  | 96.9  | 99.7  | 96.9  | 96.9  | 99.7  | 20 | Bucl15_Bm_strain_11.seq         |
| 21 | 2.1 | 5.6  | 6.3  | 2.1   | 6.8  | 6.3   | 8.1  | 4.8  | 4.8  | 5.6   | 4.8  | 8.3  | 0.9  | 0.0  | 0.9   | 0.0   | 0.9   | 0.5  | 2.9  | 0.0   | █     | 100.0 | 96.9  | 96.9  | 99.7  | 96.9  | 96.9  | 99.7  | 21 | Bucl15_Bm_NCTC_10229.seq        |
| 22 | 2.1 | 5.6  | 6.3  | 2.1   | 6.8  | 6.3   | 8.1  | 4.8  | 4.8  | 5.6   | 4.8  | 8.3  | 0.9  | 0.0  | 0.9   | 0.0   | 0.9   | 0.5  | 2.9  | 0.0   | 0.0   | █     | 96.9  | 96.9  | 99.7  | 96.9  | 96.9  | 99.7  | 22 | Bucl15_Bm_NCTC_10247.seq        |
| 23 | 2.1 | 5.6  | 6.3  | 2.1   | 6.8  | 6.3   | 7.9  | 4.8  | 4.8  | 5.6   | 4.8  | 8.3  | 0.0  | 0.9  | 0.0   | 0.9   | 0.0   | 1.4  | 1.9  | 0.9   | 0.9   | 0.9   | █     | 100.0 | 96.6  | 100.0 | 100.0 | 96.6  | 23 | Bucl15_Bm_JHU.seq               |
| 24 | 2.1 | 5.6  | 6.3  | 2.1   | 6.8  | 6.3   | 7.9  | 4.8  | 4.8  | 5.6   | 4.8  | 8.3  | 0.0  | 0.9  | 0.0   | 0.9   | 0.0   | 1.4  | 1.9  | 0.9   | 0.9   | 0.9   | 0.0   | █     | 96.6  | 100.0 | 100.0 | 96.6  | 24 | Bucl15_Bm_FMh.seq               |
| 25 | 2.6 | 5.0  | 6.3  | 2.6   | 7.4  | 6.3   | 7.5  | 4.8  | 4.8  | 5.0   | 4.8  | 8.9  | 1.4  | 0.5  | 1.4   | 0.5   | 1.4   | 0.0  | 2.4  | 0.5   | 0.5   | 0.5   | 1.4   | 1.4   | █     | 96.6  | 96.6  | 100.0 | 25 | Bucl15_Bm_ATCC_10399.seq        |
| 26 | 2.1 | 5.6  | 6.3  | 2.1   | 6.8  | 6.3   | 7.9  | 4.8  | 4.8  | 5.6   | 4.8  | 8.3  | 0.0  | 0.9  | 0.0   | 0.9   | 0.0   | 1.4  | 1.9  | 0.9   | 0.9   | 0.9   | 0.0   | 0.0   | 1.4   | █     | 100.0 | 96.6  | 26 | Bucl15_Bm_GB8_horse_4.seq       |
| 27 | 2.1 | 5.6  | 6.3  | 2.1   | 6.8  | 6.3   | 7.9  | 4.8  | 4.8  | 5.6   | 4.8  | 8.3  | 0.0  | 0.9  | 0.0   | 0.9   | 0.0   | 1.4  | 1.9  | 0.9   | 0.9   | 0.9   | 0.0   | 0.0   | 1.4   | 0.0   | █     | 96.6  | 27 | Bucl15_Bm_ATCC_23344.seq        |
| 28 | 2.6 | 5.0  | 6.3  | 2.6   | 7.4  | 6.3   | 7.5  | 4.8  | 4.8  | 5.0   | 4.8  | 8.9  | 1.4  | 0.5  | 1.4   | 0.5   | 1.4   | 0.0  | 2.4  | 0.5   | 0.5   | 0.5   | 1.4   | 1.4   | 0.0   | 1.4   | 1.4   | █     | 28 | Bucl15_Bm_SAVP1.seq             |
| 1  | 2   | 3    | 4    | 5     | 6    | 7     | 8    | 9    | 10   | 11    | 12   | 13   | 14   | 15   | 16    | 17    | 18    | 19   | 20   | 21    | 22    | 23    | 24    | 25    | 26    | 27    | 28    |       |    |                                 |

*bucl15*

Percent Identity

|    | 1   | 2    | 3    | 4    | 5    | 6    | 7     | 8     | 9    | 10   | 11   | 12   | 13   | 14   | 15   | 16   | 17    | 18   | 19    | 20   | 21    | 22    | 23   | 24   | 25    | 26    | 27    | 28    | 29    | 30    |      |                                 |                          |
|----|-----|------|------|------|------|------|-------|-------|------|------|------|------|------|------|------|------|-------|------|-------|------|-------|-------|------|------|-------|-------|-------|-------|-------|-------|------|---------------------------------|--------------------------|
| 1  | █   | 86.3 | 79.7 | 86.2 | 82.3 | 88.5 | 79.7  | 86.2  | 88.5 | 86.2 | 83.3 | 81.4 | 85.2 | 90.6 | 85.7 | 84.7 | 85.7  | 90.5 | 85.7  | 83.7 | 85.7  | 85.7  | 73.0 | 76.9 | 84.7  | 84.7  | 77.2  | 84.7  | 84.7  | 82.7  | 1    | Buc16_Bps K96243.seq            |                          |
| 2  | 1.5 | █    | 90.1 | 86.3 | 91.9 | 94.0 | 90.1  | 86.3  | 92.3 | 95.1 | 94.2 | 94.8 | 96.0 | 90.9 | 96.3 | 95.3 | 96.3  | 92.6 | 96.3  | 94.3 | 96.3  | 96.3  | 83.6 | 87.5 | 95.3  | 95.3  | 87.8  | 95.3  | 95.3  | 93.3  | 2    | Buc16_Bps MSHR 305.seq          |                          |
| 3  | 1.2 | 3.7  | █    | 78.7 | 96.8 | 85.8 | 100.0 | 78.7  | 86.5 | 86.5 | 88.6 | 94.0 | 87.2 | 84.5 | 91.6 | 92.6 | 91.6  | 86.7 | 91.6  | 93.5 | 91.6  | 91.6  | 92.6 | 96.4 | 92.6  | 92.6  | 96.8  | 92.6  | 92.6  | 94.5  | 3    | A3NSP4_BURP0_Buc16_Bp 1106a.seq |                          |
| 4  | 3.2 | 4.1  | 5.1  | █    | 80.7 | 88.8 | 78.7  | 100.0 | 90.8 | 86.4 | 83.4 | 81.6 | 85.4 | 92.6 | 86.6 | 85.7 | 86.6  | 91.5 | 86.6  | 84.7 | 86.6  | 86.6  | 74.0 | 77.9 | 85.7  | 85.7  | 79.5  | 85.7  | 85.7  | 83.7  | 4    | Buc16_Bps MSHR346.seq           |                          |
| 5  | 0.3 | 3.8  | 1.4  | 5.1  | █    | 87.6 | 96.8  | 80.7  | 88.0 | 89.0 | 91.0 | 95.9 | 89.6 | 86.3 | 93.0 | 94.0 | 93.0  | 88.1 | 93.0  | 94.9 | 93.0  | 93.0  | 90.1 | 94.0 | 94.0  | 94.0  | 94.3  | 94.0  | 94.0  | 95.9  | 5    | Buc16_Bps 1026b.seq             |                          |
| 6  | 2.5 | 3.9  | 5.7  | 4.7  | 5.8  | █    | 85.8  | 88.8  | 93.3 | 95.8 | 92.8 | 89.0 | 94.8 | 91.5 | 91.3 | 90.3 | 91.3  | 93.2 | 91.3  | 89.3 | 91.3  | 91.3  | 78.6 | 82.5 | 90.3  | 90.3  | 83.3  | 90.3  | 90.3  | 88.3  | 6    | Buc16_Bps 1710b.seq             |                          |
| 7  | 1.2 | 3.7  | 0.0  | 5.1  | 1.4  | 5.7  | █     | 78.7  | 86.5 | 86.5 | 88.6 | 94.0 | 87.2 | 84.5 | 91.6 | 92.6 | 91.6  | 86.7 | 91.6  | 93.5 | 91.6  | 91.6  | 92.6 | 96.4 | 92.6  | 92.6  | 96.8  | 92.6  | 92.6  | 94.5  | 7    | Buc16_Bps BPC006.seq            |                          |
| 8  | 3.2 | 4.1  | 5.1  | 0.0  | 5.1  | 4.7  | 5.1   | █     | 90.8 | 86.4 | 83.4 | 81.6 | 85.4 | 92.6 | 86.6 | 85.7 | 86.6  | 91.5 | 86.6  | 84.7 | 86.6  | 86.6  | 74.0 | 77.9 | 85.7  | 85.7  | 79.5  | 85.7  | 85.7  | 83.7  | 8    | Buc16_Bps 668.seq               |                          |
| 9  | 2.5 | 3.5  | 2.3  | 3.6  | 2.8  | 6.0  | 2.3   | 3.6   | █    | 91.2 | 88.3 | 87.6 | 90.2 | 95.7 | 94.2 | 93.2 | 94.2  | 97.1 | 94.2  | 92.2 | 94.2  | 94.2  | 81.6 | 85.4 | 93.2  | 93.2  | 86.2  | 93.2  | 93.2  | 91.3  | 9    | Buc16_Bps NCTC 13179.seq        |                          |
| 10 | 3.0 | 4.7  | 7.0  | 5.3  | 6.3  | 2.8  | 7.0   | 5.3   | 6.3  | █    | 97.0 | 90.2 | 99.0 | 89.9 | 92.4 | 91.5 | 92.4  | 91.2 | 92.4  | 90.5 | 92.4  | 92.4  | 79.8 | 83.7 | 91.5  | 91.5  | 84.7  | 91.5  | 91.5  | 89.5  | 10   | Buc16_Bps MSHR146.seq           |                          |
| 11 | 3.0 | 4.6  | 7.9  | 5.4  | 7.2  | 2.9  | 7.9   | 5.4   | 6.1  | 0.1  | █    | 92.9 | 98.0 | 87.1 | 91.6 | 92.2 | 91.6  | 88.3 | 91.6  | 92.9 | 91.6  | 91.6  | 81.9 | 85.8 | 92.2  | 92.2  | 86.7  | 92.2  | 92.2  | 91.6  | 11   | Buc16_Bps MSHR511.seq           |                          |
| 12 | 1.5 | 0.4  | 4.6  | 3.9  | 4.6  | 4.0  | 4.6   | 3.9   | 3.3  | 4.8  | 4.9  | █    | 91.0 | 86.2 | 91.6 | 92.3 | 91.6  | 87.8 | 91.6  | 93.1 | 91.6  | 91.6  | 87.5 | 91.4 | 92.3  | 92.3  | 91.7  | 92.3  | 92.3  | 93.9  | 12   | Buc16_Bps MSHR520.seq           |                          |
| 13 | 3.0 | 4.8  | 7.4  | 5.3  | 6.7  | 2.8  | 7.4   | 5.3   | 6.3  | 0.0  | 0.1  | 4.9  | █    | 88.9 | 93.4 | 92.1 | 93.4  | 90.2 | 93.4  | 91.2 | 93.4  | 93.4  | 80.5 | 84.4 | 92.1  | 92.1  | 85.3  | 92.1  | 92.1  | 90.2  | 13   | Buc16_Bps NAU20B-16.seq         |                          |
| 14 | 2.2 | 2.9  | 2.5  | 4.8  | 2.6  | 6.0  | 2.5   | 4.8   | 2.2  | 5.6  | 5.4  | 2.7  | 5.6  | █    | 92.3 | 91.4 | 92.3  | 97.2 | 92.3  | 90.4 | 92.3  | 92.3  | 79.7 | 83.6 | 91.4  | 91.4  | 83.9  | 91.4  | 91.4  | 89.4  | 14   | Buc16_Bps NCTC 13178.seq        |                          |
| 15 | 1.5 | 3.6  | 1.1  | 4.5  | 1.8  | 6.5  | 1.1   | 4.5   | 2.0  | 7.3  | 7.1  | 3.5  | 7.2  | 1.9  | █    | 98.7 | 100.0 | 94.8 | 100.0 | 97.7 | 100.0 | 100.0 | 87.1 | 90.9 | 98.7  | 98.7  | 91.3  | 98.7  | 98.7  | 96.8  | 15   | Buc16_Bm 2000031281.seq         |                          |
| 16 | 1.5 | 3.7  | 1.1  | 4.5  | 1.8  | 6.5  | 1.1   | 4.5   | 2.0  | 7.3  | 7.4  | 3.7  | 7.7  | 1.9  | 0.4  | █    | 98.7  | 93.9 | 98.7  | 98.7 | 98.7  | 98.7  | 88.0 | 91.9 | 100.0 | 100.0 | 92.2  | 100.0 | 100.0 | 97.7  | 16   | Buc16_Bm 2002721280.seq         |                          |
| 17 | 1.5 | 3.6  | 1.1  | 4.5  | 1.8  | 6.5  | 1.1   | 4.5   | 2.0  | 7.3  | 7.1  | 3.5  | 7.2  | 1.9  | 0.0  | 0.4  | █     | 94.8 | 100.0 | 97.7 | 100.0 | 100.0 | 87.1 | 90.9 | 98.7  | 98.7  | 91.3  | 98.7  | 98.7  | 96.8  | 17   | Buc16_Bm A188.seq               |                          |
| 18 | 1.5 | 2.4  | 1.2  | 4.5  | 1.9  | 5.4  | 1.2   | 4.5   | 2.0  | 5.5  | 5.4  | 2.3  | 5.5  | 1.9  | 0.4  | 0.4  | 0.4   | █    | 94.8  | 92.9 | 94.8  | 94.8  | 82.2 | 86.1 | 93.9  | 93.9  | 86.4  | 93.9  | 93.9  | 91.9  | 18   | Buc16_Bm A193.seq               |                          |
| 19 | 1.5 | 3.6  | 1.1  | 4.5  | 1.8  | 6.5  | 1.1   | 4.5   | 2.0  | 7.3  | 7.1  | 3.5  | 7.2  | 1.9  | 0.0  | 0.4  | 0.0   | 0.4  | █     | 97.7 | 100.0 | 100.0 | 87.1 | 90.9 | 98.7  | 98.7  | 91.3  | 98.7  | 98.7  | 96.8  | 19   | Buc16_Bm China 7.seq            |                          |
| 20 | 1.5 | 3.7  | 1.1  | 4.5  | 1.7  | 6.5  | 1.1   | 4.5   | 2.0  | 7.3  | 7.8  | 3.9  | 7.7  | 1.9  | 0.4  | 0.4  | 0.4   | 0.4  | 0.4   | █    | 97.7  | 97.7  | 89.0 | 92.9 | 98.7  | 98.7  | 93.2  | 98.7  | 98.7  | 98.7  | 20   | Buc16_Bm PRL-20.seq             |                          |
| 21 | 1.5 | 3.6  | 1.1  | 4.5  | 1.8  | 6.5  | 1.1   | 4.5   | 2.0  | 7.3  | 7.1  | 3.5  | 7.2  | 1.9  | 0.0  | 0.4  | 0.0   | 0.4  | 0.0   | 0.4  | █     | 100.0 | 87.1 | 90.9 | 98.7  | 98.7  | 91.3  | 98.7  | 98.7  | 96.8  | 21   | Buc16_Bm strain_6.seq           |                          |
| 22 | 1.5 | 3.6  | 1.1  | 4.5  | 1.8  | 6.5  | 1.1   | 4.5   | 2.0  | 7.3  | 7.1  | 3.5  | 7.2  | 1.9  | 0.0  | 0.4  | 0.0   | 0.4  | 0.0   | 0.4  | 0.0   | █     | 87.1 | 90.9 | 98.7  | 98.7  | 91.3  | 98.7  | 98.7  | 96.8  | 22   | Buc16_Bm strain_11.seq          |                          |
| 23 | 1.5 | 3.7  | 1.0  | 4.5  | 1.7  | 6.5  | 1.0   | 4.5   | 2.0  | 7.3  | 8.2  | 4.6  | 7.7  | 1.9  | 0.4  | 0.4  | 0.4   | 0.4  | 0.4   | 0.4  | 0.4   | 0.4   | 0.4  | █    | 95.8  | 88.0  | 88.0  | 94.2  | 88.0  | 88.0  | 90.0 | 23                              | Buc16_Bm NCTC 10229.seq  |
| 24 | 1.5 | 3.7  | 1.0  | 4.5  | 1.7  | 6.5  | 1.0   | 4.5   | 2.0  | 7.3  | 8.2  | 4.6  | 7.7  | 1.9  | 0.4  | 0.4  | 0.4   | 0.4  | 0.4   | 0.4  | 0.4   | 0.4   | 0.4  | 0.3  | █     | 91.9  | 91.9  | 98.1  | 91.9  | 91.9  | 93.9 | 24                              | Buc16_Bm NCTC 10247.seq  |
| 25 | 1.5 | 3.7  | 1.1  | 4.5  | 1.8  | 6.5  | 1.1   | 4.5   | 2.0  | 7.3  | 7.4  | 3.7  | 7.7  | 1.9  | 0.4  | 0.0  | 0.4   | 0.4  | 0.4   | 0.4  | 0.4   | 0.4   | 0.4  | 0.4  | 0.4   | 0.0   | 100.0 | 92.2  | 100.0 | 100.0 | 97.7 | 25                              | Buc16_Bm FMH.seq         |
| 26 | 1.5 | 3.7  | 1.1  | 4.5  | 1.8  | 6.5  | 1.1   | 4.5   | 2.0  | 7.3  | 7.4  | 3.7  | 7.7  | 1.9  | 0.4  | 0.0  | 0.4   | 0.4  | 0.4   | 0.4  | 0.4   | 0.4   | 0.4  | 0.4  | 0.4   | 0.0   | █     | 92.2  | 100.0 | 100.0 | 97.7 | 26                              | Buc16_Bm JHU.seq         |
| 27 | 2.4 | 4.5  | 1.8  | 3.6  | 2.4  | 6.8  | 1.8   | 3.6   | 2.2  | 7.3  | 8.2  | 5.4  | 7.7  | 2.7  | 1.1  | 1.1  | 1.1   | 1.2  | 1.1   | 1.1  | 1.1   | 1.1   | 1.0  | 1.0  | 1.1   | 1.1   | █     | 92.2  | 92.2  | 94.2  | 27   | Buc16_Bm ATCC 10399.seq         |                          |
| 28 | 1.5 | 3.7  | 1.1  | 4.5  | 1.8  | 6.5  | 1.1   | 4.5   | 2.0  | 7.3  | 7.4  | 3.7  | 7.7  | 1.9  | 0.4  | 0.0  | 0.4   | 0.4  | 0.4   | 0.4  | 0.4   | 0.4   | 0.4  | 0.4  | 0.4   | 0.0   | 0.0   | 1.1   | █     | 100.0 | 97.7 | 28                              | Buc16_Bm GB8 horse 4.seq |
| 29 | 1.5 | 3.7  | 1.1  | 4.5  | 1.8  | 6.5  | 1.1   | 4.5   | 2.0  | 7.3  | 7.4  | 3.7  | 7.7  | 1.9  | 0.4  | 0.0  | 0.4   | 0.4  | 0.4   | 0.4  | 0.4   | 0.4   | 0.4  | 0.4  | 0.4   | 0.0   | 0.0   | 1.1   | 0.0   | █     | 97.7 | 29                              | Buc16_Bm ATCC 23344.seq  |
| 30 | 1.5 | 3.7  | 1.1  | 4.5  | 1.7  | 6.5  | 1.1   | 4.5   | 2.0  | 7.3  | 8.2  | 4.1  | 7.7  | 1.9  | 0.4  | 0.4  | 0.4   | 0.4  | 0.4   | 0.4  | 0.4   | 0.4   | 0.4  | 0.4  | 0.4   | 0.4   | 0.4   | 1.1   | 0.4   | 0.4   | █    | 30                              | Buc16_Bm SAVP1.seq       |

*buc16*

| Bucl No. | % identity range | Average % identity |
|----------|------------------|--------------------|
| 1        | 73.1-100         | 90.37              |
| 2        | 74.1-100         | 89.96              |
| 3        | 66.4-99.8        | 85.95              |
| 4        | 70.4-100         | 89.88              |
| 5        | 69.2-99.6        | 88.36              |
| 6        | 43.1-100         | 76.45              |
| 7        | 83.6-99.5        | 94.91              |
| 8        | 78.3-100         | 94.14              |
| 10       | 58.9-100         | 84.63              |
| 13       | 86.9-99.8        | 93.87              |
| 14       | 42-100           | 92.17              |
| 15       | 45.1-100         | 86.36              |
| 16       | 73-100           | 91.17              |
